## Chiral cilia orientation in the left-right organizer

Rita R. Ferreira<sup>1,2,3,4</sup>, Guillaume Pakula<sup>5</sup>, Lhéanna Klaeyle<sup>1,2,3,4</sup>, Hajime Fukui<sup>1,2,3,4</sup>, Andrej Vilfan<sup>6,7</sup>, Willy Supatto<sup>5</sup> and Julien Vermot<sup>1,2,3,4</sup>

<sup>1</sup>Institut de Génétique et de Biologie Moléculaire et Cellulaire, Illkirch, France

<sup>2</sup>Centre National de la Recherche Scientifique, UMR7104, Illkirch, France

<sup>3</sup> Institut National de la Santé et de la Recherche Médicale, U1258, 67404 Illkirch, France

<sup>4</sup>Université de Strasbourg, Illkirch, France

<sup>5</sup>Laboratory for Optics and Biosciences, Ecole Polytechnique, Centre National de la Recherche Scientifique (UMR7645), Institut National de la Santé et de la Recherche Médicale (U1182) and Paris Saclay University, Palaiseau, France

<sup>6</sup>J. Stefan Institute, Ljubljana, Slovenia

<sup>7</sup>Max Planck Institute for Dynamics and Self-Organization (MPIDS), 37077 Göttingen, Germany

### Abstract

**Chirality is a property of asymmetry between an object and its mirror image. Most biomolecules and cells are intrinsically chiral. Whether cellular chirality can be transferred to asymmetry at the tissue scale remains an unresolved issue. This question is particularly relevant in the left-right organizer (LRO), where cilia motility and chiral flow are thought to be the main drivers of left-right axis symmetry breaking. Here, we built a quantitative approach based on live imaging to set apart the contributions of various pathways to the spatial orientation of cilia in the Kupffer's vesicle (KV, zebrafish LRO). We found that cilia populating the zebrafish LRO display an asymmetric orientation between the right and left side of the LRO. Cilia orientations, therefore, give the KV cells a sense of chirality which is different from the chirality of cilia rotation. Surprisingly, we found this asymmetry does not depend on the left-right signalling pathway or flow. Furthermore, we show the establishment of the chirality is dynamic and depends on planar cell polarity. Together, this work identifies a different type of asymmetry in the LRO and sheds light on the complexity of chirality genesis in developing tissues.**

36 A chiral object cannot be superimposed on its mirror image. Most biological molecules are chiral. Yet,  
37 how macroscopic chiral asymmetries arise in physics and biology is still debated (Morrow et al., 2017;  
38 Wagnière, 2007). In living systems, a number of independent mechanisms of chirality establishment have  
39 been identified, from the subcellular to the tissue scale (Blum et al., 2014; Coutelis et al., 2014; Dasgupta  
40 and Amack, 2016; Gomez-Lopez et al., 2014; Hamada and Tam, 2014; Levin, 2005; Naganathan et al.,  
41 2014; Noel et al., 2013; Tee et al., 2015). The most studied system is certainly the mechanism that sets  
42 asymmetric gene expression around the left-right organizers (LRO) of vertebrates (Ferreira and Vermot,  
43 2016). Generally, asymmetrical signals are generated in LROs as a response to a directional flow driven  
44 by motile cilia (Shinohara and Hamada, 2017). In the LRO, the orientation of cilia rotation follows a  
45 clockwise motion and is invariable amongst vertebrates (Okada et al., 2005). These properties are key for  
46 controlling the chiral direction of the flow (Hilfinger and Julicher, 2008; Shinohara and Hamada, 2017).  
47 Nevertheless, other cellular chiral features at the scale of the whole LRO have never been investigated.

48  
49 In zebrafish, the LRO is called the Kupffer's vesicle (KV) (Figure 1A). Before any sign of asymmetric cell  
50 response, the KV consists of a sphere containing monociliated cells where a directional flow progressively  
51 emerges as a result of stereotyped cilia spatial orientation (Ferreira et al., 2017). Over the course of  
52 hours, the cilia-generated flow triggers an asymmetric calcium response on the left side of the cavity  
53 (Francescatto et al., 2010; Sarmah et al., 2005; Yuan et al., 2015), and, consequently, a left-biased  
54 asymmetric pattern of gene expression (Essner et al., 2005; Kramer-Zucker et al., 2005). Coordinating  
55 appropriate cilia spatial orientation with directional flow generation is thus critical for the subsequent  
56 asymmetric response and proper LR patterning (Hashimoto and Hamada, 2010). Current studies have  
57 posited that flow patterns arise first in the LRO and then dictate the symmetry-breaking event (Blum et al.,  
58 2014; Shinohara and Hamada, 2017). This has led to the inference that symmetry breaking initiation  
59 depends on the establishment of symmetrical LRO where cilia orientation is tightly controlled by the  
60 Planar Cell Polarity (PCP) pathway (Hashimoto and Hamada, 2010; Marshall and Kintner, 2008; Song et  
61 al., 2010). In this model, the direction of cilia rotation leading to the directional flow is the only known  
62 chiral element in the LRO. However, a number of studies have suggested that subcellular chirality  
63 associated with cytoskeletal asymmetric order could also participate in setting the LR axis, in particular in  
64 asymmetric animals where no LRO have been identified (Davison et al., 2016; Hozumi et al., 2006;  
65 Kuroda et al., 2009; Sato et al., 2015; Shibazaki et al., 2004; Speder et al., 2006). This raises the  
66 intriguing possibility that the LRO could use subcellular chiral information for symmetry breaking. In the  
67 absence of tools for visualizing potential chirality in the LRO, however, it is difficult to establish if cell  
68 chirality could participate in the process of symmetry breaking. To meet this challenge, we developed a  
69 quantitative analysis based on live imaging allowing the investigation of the LRO chirality and the  
70 identification of the factors controlling it.

71

72 Tissue chirality can result from asymmetric cell shape and asymmetric organelle distribution at the cell  
73 scale (Wan et al., 2011; Xu et al., 2007). We reasoned that as an asymmetry generator, the LRO itself  
74 constitutes a candidate for being a chiral organ. We made use of the ellipsoidicity of the KV to assess the  
75 symmetry of cilia orientation by focusing on the two angles defining cilia orientation in 3D (Figure 1B):  $\theta$   
76 (tilt) is the angle of the cilium with respect to the KV surface normal ( $0^\circ$  for a cilium orthogonal to the KV  
77 surface and  $90^\circ$  for parallel);  $\varphi$  is the orientation of the cilium projected on the KV surface ( $0^\circ$  for a cilium  
78 pointing in a meridional direction towards the dorsal pole). Thus, the meridional tilt of cilia reported in wild-  
79 type (WT) KV corresponds to  $\theta > 0^\circ$  and  $\varphi$  close to  $0^\circ$ , meaning that cilia point dorsally following the  
80 meridians of a sphere (Ferreira et al., 2017). We performed live-imaging using the zebrafish  
81 *act2b:Mmu.Arl13bGFP* transgenic line where cilia are fluorescently labelled (Borovina et al., 2010). Next,  
82 we extracted the angles  $\theta_{\text{avg}}$  and  $\varphi_{\text{avg}}$  of the average cilia orientation vector in both hemispheres of the KV  
83 between the 9 and 14 somite stage (SS), when the chiral flow is fully established. To quantify differences  
84 in cilia orientation between the left and right sides, we calculated separately for each side the average  
85 cilium direction in local coordinates (Figure 1B). In analogy to an individual cilium, the angles  $\varphi_{\text{avg}}$  and  $\theta_{\text{avg}}$   
86 describe the direction of the average orientation vector on each side. In case of a mirror-symmetric KV,  
87  $\theta_{\text{avg}}$  of the average cilium is equal on the left and on the right sides and the  $\varphi_{\text{avg}}$  angles are mirror-imaged:  
88  $\theta_{\text{avg\_left}} = \theta_{\text{avg\_right}}$ , and  $\varphi_{\text{avg\_left}} = -\varphi_{\text{avg\_right}} = \varphi_{\text{avg\_right\_mirror}}$ . To quantitatively assess the significance of  
89 asymmetries in the KV, we designed a permutation test based on the definition of chirality (see Methods)  
90 and calculated p-values estimating the likelihood that an *a priori* symmetric KV will show an equal or  
91 larger difference  $|\varphi_{\text{avg\_left}} - \varphi_{\text{avg\_right\_mirror}}|$  due to variability.

92  
93 We extracted and averaged the results obtained from 14 WT vesicles with a total of 730 cilia, and  
94 estimated the  $\theta_{\text{avg}}$  and  $\varphi_{\text{avg}}$  angles of the average cilium in 3D. There was a difference between the  
95 measured  $\varphi$  angle on the left and the right sides of the KV (Figure 1C). While right-sided cilia are almost  
96 perfectly oriented along the meridional direction ( $\varphi_{\text{avg\_right}} = +1^\circ$ , Figure 1D-E), cilia in the left hemisphere  
97 exhibit a strong tilt following the direction of the flow ( $\varphi_{\text{avg\_left}} = +28^\circ$ , Figure 1D-E). On average, it defines  
98 a dextral orientation over the whole vesicle (Sup. Figure 2A). The permutation test confirmed the  
99 significance ( $p < 0.001$ ) of the observed asymmetry in cilia orientations between the left and right side of  
100 the KV ( $\varphi_{\text{avg\_left}} \neq -\varphi_{\text{avg\_right}}$ ) (Methods and Table 1). No difference in tilt angles was observed between the  
101 left and right hemispheres ( $\theta_{\text{avg\_left}} = \theta_{\text{avg\_right}}$ ; Sup. Figure 1A). Together, these results show that cilia  
102 orientation is asymmetric in the KV and follows a dextral chirality.

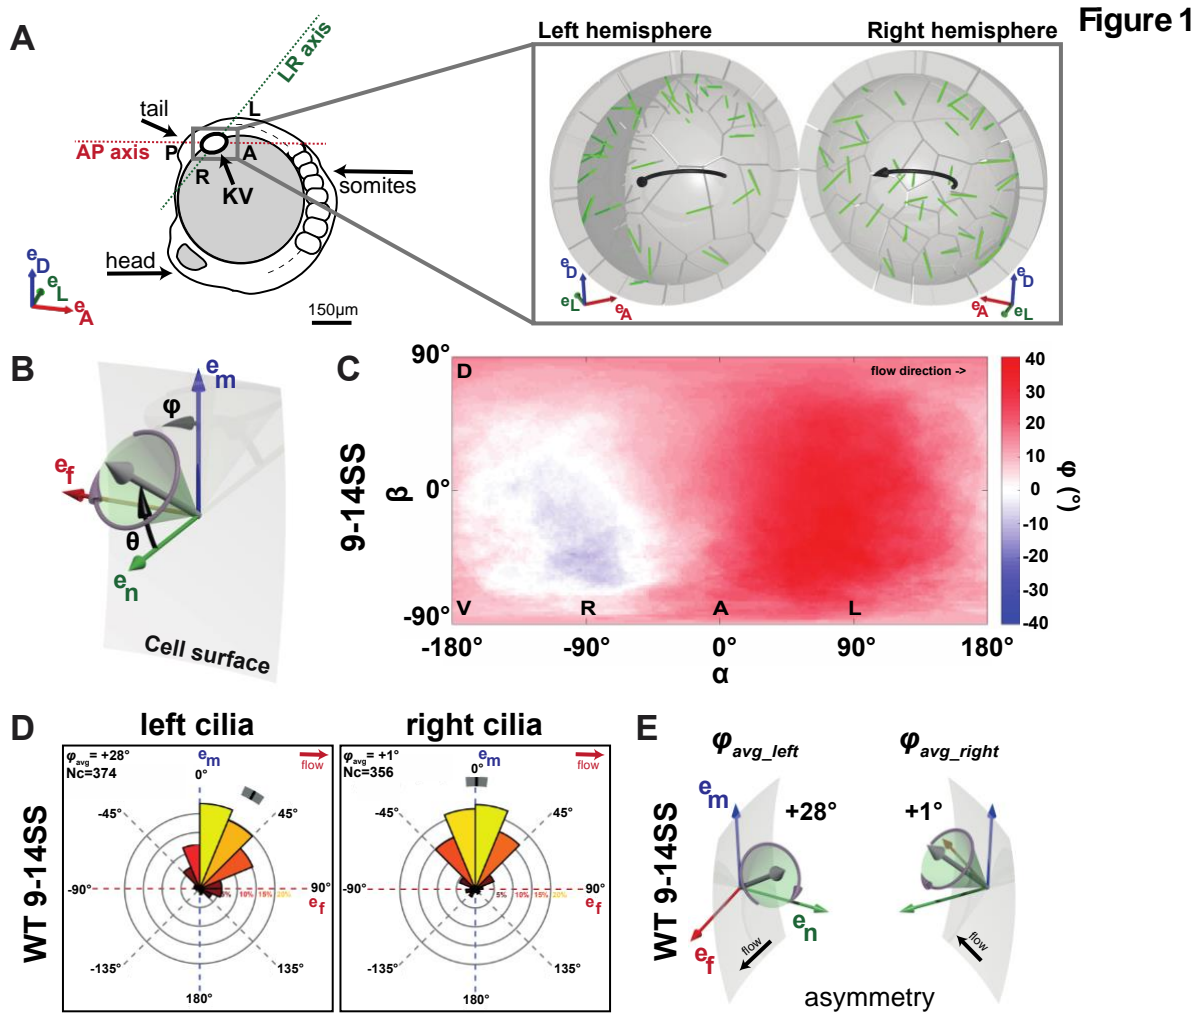

103  
104  
105  
106  
107  
108  
109  
110  
111  
112  
113  
114  
115  
116

**Figure 1: The zebrafish left-right organizer is asymmetric.** (A) Schematics of the zebrafish embryo (left panel) highlighting the KV localization (grey box). The zoom-up box (right panel) shows the transverse section of the KV, depicting the cilia (in green) and the directional flow (black arrows). The embryonic body plan axes are marked as AP (anterior-posterior) and LR (left-right). The body plan reference frame is defined by basis vectors  $e_D$  (dorsal),  $e_L$  (left),  $e_A$  (anterior). (B) Cilia orientations are represented by two angles:  $\theta$  (tilt angle from the surface normal  $e_n$ ) and  $\phi$  (angle between the surface projection of the ciliary vector and the meridional direction  $e_m$ ). Cell surface is represented in grey,  $e_m$  in blue,  $e_f$  in red and the normal  $e_n$  in green. (C-D) Distributions of  $\phi$  at 9-14SS in a 2D flat map (C) or rosette plots (D) obtained from 14 wild-type vesicles with a total of 730 cilia. (C) Average  $\phi$  values displayed in a 2D flat map showing  $\phi$  on the left ( $0^\circ \leq \alpha \leq 90^\circ$  and  $-90^\circ \leq \beta \leq 90^\circ$ ) is higher (red) than  $\phi$  on the right ( $-90^\circ \leq \alpha \leq 0^\circ$  and  $-90^\circ \leq \beta \leq 90^\circ$ ). (D) Rosette plots showing the  $\phi$  angle distribution for the left and right-sided motile cilia, and the 95% confidence interval (grey stripe) for the population mean (black tick). In each rosette,  $0^\circ$  indicates the meridional direction ( $e_m$ ) and  $90^\circ$  the flow direction ( $e_f$ ). Most cilia exhibit  $\phi$  angles between  $[-45^\circ; +45^\circ]$ , corresponding to a meridional tilt (Ferreira et al., 2017). (E) Schematics showing the  $\phi_{avg}$  of the 3D resultant vector on the left and right sides of the KV at 9-14SS. Nc = number of cilia.

117 To gain a better sense of when the chirality of cilia orientation begins, we analyzed cilia orientation in KV  
118 in embryos at different developmental stages. We quantified the  $\phi$  angle distributions of cilia from both  
119 hemispheres of WT embryos at 3SS (early-stage), when the first signs of LR asymmetry have been  
120 reported (Yuan et al., 2015), at 6SS and at 8SS (mid-stages). At 3SS, two populations of cilia exist in the

121 KV, motile and immotile. Neither the motile ( $\varphi_{\text{avg\_left}} = +15^\circ$  and  $\varphi_{\text{avg\_right}} = -20^\circ$ ; Figure 2A-B), nor the  
 122 immotile cilia population ( $\varphi_{\text{avg\_left}} = +32^\circ$  and  $\varphi_{\text{avg\_right}} = -8^\circ$ ; Sup. Figure 2B) exhibit a significant difference  
 123 between the left and right sides of the KV ( $\varphi_{\text{avg\_left}} \approx -\varphi_{\text{avg\_right}}$ , Table 1), resulting in a  $\varphi_{\text{avg}}$  close to  $0^\circ$  at  
 124 3SS (Figure 3A). WT embryos at 6SS show some asymmetry (Figure 3A), but it is not yet statistically  
 125 significant ( $p=0.086$ , Table 1). Interestingly, at 8SS the side-biased orientation ( $\varphi_{\text{avg\_left}} = +19^\circ$  and  $\varphi_{\text{avg\_right}}$   
 126  $= +4^\circ$ ; Figure 2A-C) becomes significant enough to reveal an overall asymmetry of the KV (Figure 3A and  
 127 Table 1). These results show that the orientation differences are not changing linearly between left and  
 128 right, where the left angle does not change much between 3SS and 8SS and the right side changes more  
 129 significantly. We also assessed the variability of cilia orientation by plotting the mean orientation on the  
 130 left vs. right side for each embryo (Sup. Figure 3A). The variability between embryos is always  
 131 substantial, but it reduces with time and all 14 embryos at 9-14SS show asymmetry in the same direction.  
 132 When considering  $\theta$  angle distributions at 3, 6 and 8SS, we did not find any asymmetry between the left  
 133 and right-side of the KV, demonstrating that the cilia tilt remains symmetrical over time (Sup. Figure 1A).  
 134 Together, these results demonstrate that cilia orientation in the LRO does not exhibit any asymmetry until  
 135 6SS and becomes progressively asymmetric during the course of KV development and LR patterning.

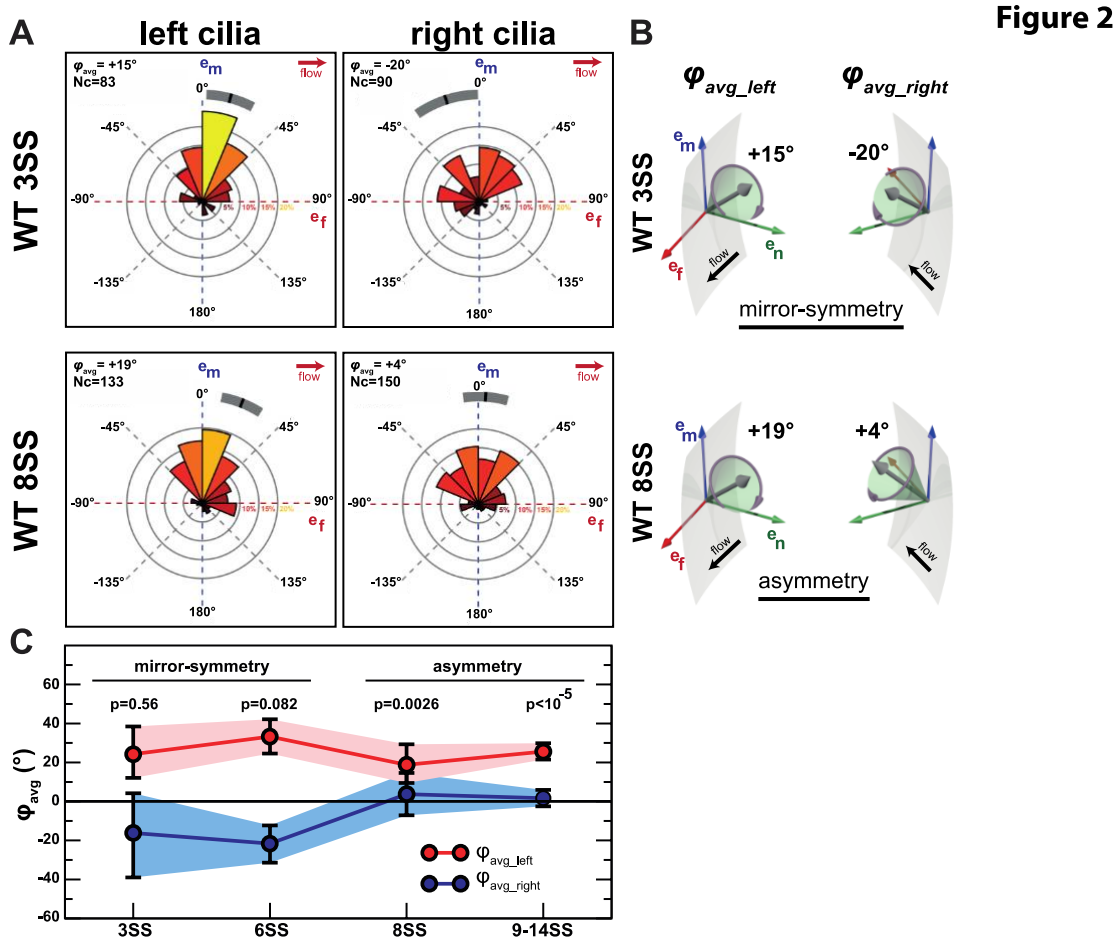



137 **Figure 2: Asymmetric cilia orientation arises over time. (A)** Rosette plots showing the  $\phi$  angle distributions for the left- (left  
138 panel) and right-sided (right panel) cilia, with their mean (black tick) and associated 95% confidence interval (grey stripe), for WT  
139 3SS (upper panel) and WT 8SS (lower panel). In each rosette,  $0^\circ$  indicates the meridional direction ( $e_m$ ) and  $90^\circ$  the flow direction  
140 ( $e_f$ ). **(B)** Schematics showing the  $\phi_{avg}$  of the 3D resultant vector on the left and right sides of the KV at 3SS (upper panel) and 8SS  
141 (lower panel). **(C)** Mean orientation  $\phi_{avg}$  of motile cilia in the left (red) and right (blue) half of the KV as a function of time. The error  
142 bars and shaded regions display 95% confidence intervals. Nc = number of cilia.

143

144 Considering the function of the KV is to generate an asymmetrical signal, we investigated whether the  
145 observed asymmetry of the KV itself is modulated by the LR signalling pathway. According to current  
146 models of symmetry breaking, the asymmetric expression of genes around the LRO is under the control  
147 of *pkd2* that acts as a flow sensor and leads to the left-sided expression of *spaw*, a nodal-related gene  
148 involved in the establishment of the left-right asymmetry (Schottenfeld et al., 2007; Yuan et al., 2015). To  
149 test the impact of flow sensing and asymmetric gene expression downstream of flow on asymmetric cilia  
150 orientation, we used *cup<sup>lc241</sup>* (Schottenfeld et al., 2007) and *spaw<sup>s457</sup>* (Kalogirou et al., 2014) mutants  
151 where *pkd2* and *spaw* are not functional, respectively. As expected, both *cup<sup>-/-</sup>* and *spaw<sup>-/-</sup>* embryos have  
152 laterality defects (Sup. Figure 4B-C and Table 2). By analyzing the KV cilia orientation, we found a normal  
153 meridional orientation of cilia (Sup. Figure 2C,  $\phi_{avg} \neq 0^\circ$  in Figure 3A) and permutation tests show that  
154 there is an overall asymmetry in the KV ( $\phi_{avg\_left} \neq -\phi_{avg\_right}$ ) in both *cup<sup>-/-</sup>* and *spaw<sup>-/-</sup>* KV cilia at 8SS.  
155 Together these results indicate that asymmetric cilia orientation is not dependent upon the LR signalling  
156 cascade in the LRO.

157

158 Actomyosin contractility is a well-known modulator of tissue chirality *in vitro* (Wan et al., 2011) and *in vivo*  
159 during early development of asymmetry in *Xenopus* embryos (Qiu et al., 2005), and cardiac looping in  
160 vertebrate embryos (Noel et al., 2013; Taber, 2006). In addition, it has been shown that the migration of  
161 the basal body to the apical surface of cells is essential for cilia formation (Hong et al., 2015; Pitaval et al.,  
162 2010) as well as important for cell-cell tension regulation during KV morphogenesis (Wang et al., 2012)  
163 and LR determination (Gros et al., 2009; Tabin and Vogan, 2003; Wang et al., 2012). Furthermore,  
164 actomyosin contractility has been shown to be important for KV morphogenesis and flow (Wang et al.,  
165 2011; Wang et al., 2012). We thus assessed its impact on asymmetric cilia orientation. To do so, we used  
166 blebbistatin and the *rock2b*-morpholino (*rock2b*-MO) to block myosin-II activation (Wang et al., 2011).  
167 Both blebbistatin-treated and *rock2b*-MO embryos exhibit laterality defects (Sup. Figure 4B-C and Table  
168 2) and abnormal cell clustering in the anterior side of the KV (Sup. Figure 1D) as previously described  
169 (Wang et al., 2011; Wang et al., 2012). Cilia orientation analysis showed that the *rock2b*-Myosin-II  
170 pathway does not interfere with the meridional tilt of KV cilia (Sup. Figure 2C). Permutation tests show  
171 that the KV at 8SS is overall asymmetric ( $\phi_{avg\_left} \neq -\phi_{avg\_right}$ ) for both blebbistatin and *rock2b*-MO treated  
172 embryos ( $\phi_{avg} \neq 0^\circ$  in Figure 3A with corresponding p values; Table 1). Overall these results indicate that  
173 asymmetric cilia orientation is not under the control of the *rock2b*-Myosin-II pathway (Ferreira et al.,  
174 2017), and, more generally, the main components of the LR signaling acting upstream and downstream  
175 of the flow operating in the LRO.

176

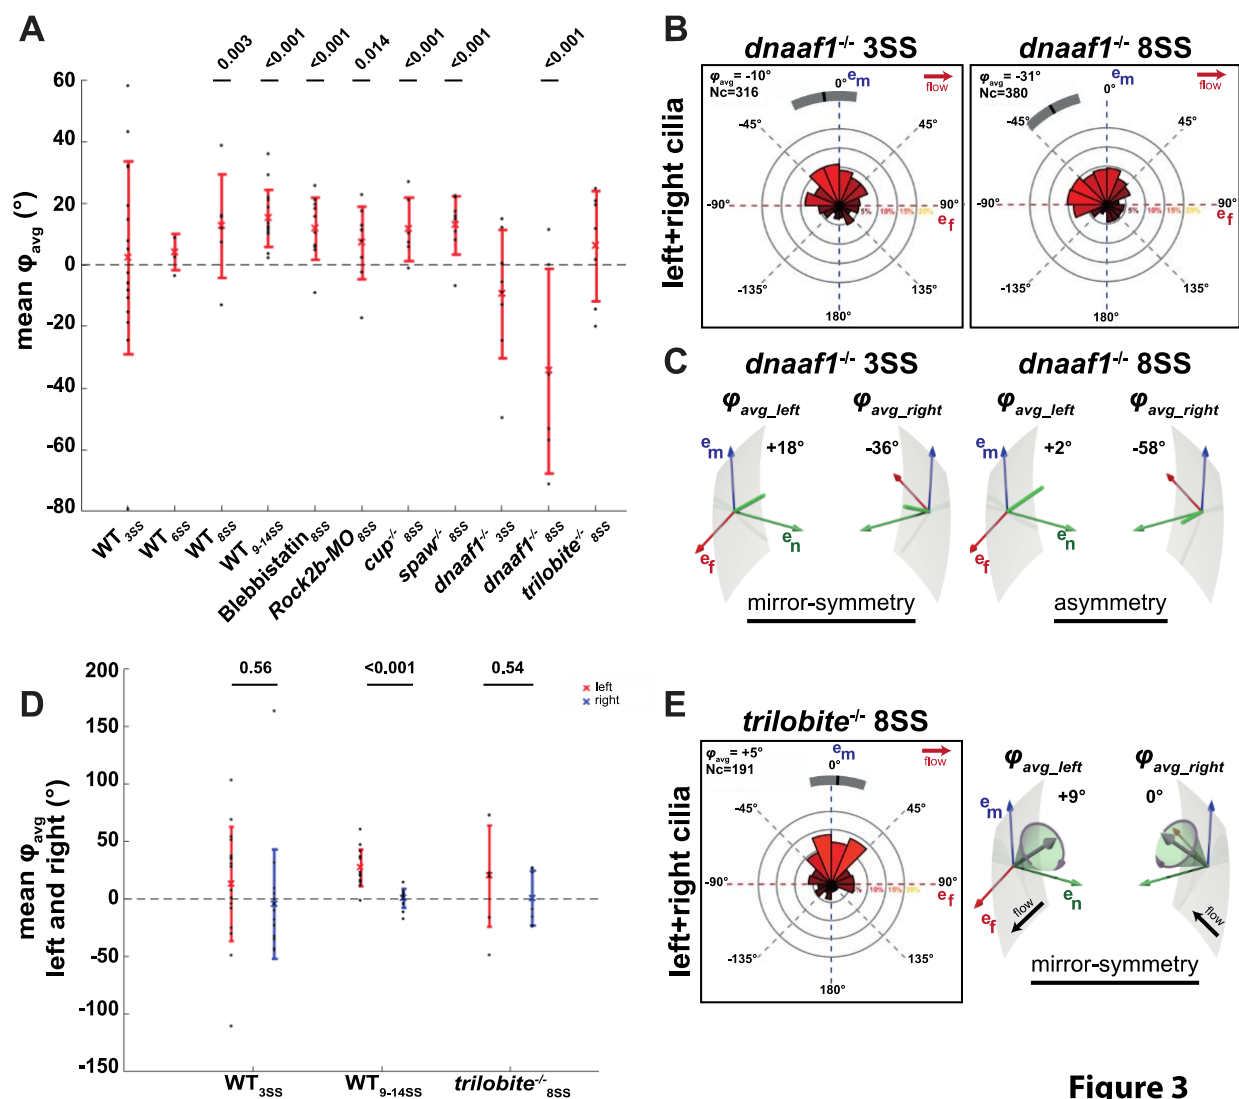

**Figure 3**

177  
 178 **Figure 3: DNAAF1 and PCP are important for asymmetric cilia orientation. (A)** Dot plot displaying the mean values of  $\varphi_{\text{avg}}$  for  
 179 each condition. Each black dot represents the mean values for one individual KV, the cross displays the average value for all KVs of  
 180 the respective condition and the line the standard deviation. The mean values of  $\varphi_{\text{avg}}$  are always greater than zero, except for  
 181 *dnaaf1*<sup>-/-</sup>, which are below zero, revealing that its orientation with respect to the meridional direction is reversed. Also, WT<sub>3SS</sub>, WT<sub>6SS</sub>,  
 182 *dnaaf1*<sup>-/-</sup><sub>3SS</sub>, and *trilobite*<sup>-/-</sup><sub>8SS</sub> have  $\varphi_{\text{avg}}$  mean values close to zero, demonstrating a LR symmetry in the KV. The p-values result from  
 183 a permutation test under the null hypothesis of a mirror-symmetric KV  $\varphi_{\text{avg\_left}} = -\varphi_{\text{avg\_right}}$ , which is equivalent to  $\varphi_{\text{avg}} = 0$  (see  
 184 Methods). **(B)** Rosette plots showing the  $\varphi$  angle distribution of cilia in both KV hemispheres (left+right cilia), for *dnaaf1*<sup>-/-</sup> 3SS (upper  
 185 panel) and *dnaaf1*<sup>-/-</sup> 8SS (lower panel). Both *dnaaf1*<sup>-/-</sup> 3SS and *dnaaf1*<sup>-/-</sup> 8SS cilia are inclined in the opposite direction to the flow  
 186 ( $e_f$ ). **(C)** Schematics showing the  $\varphi_{\text{avg}}$  of the 3D resultant vector on the left and right sides of the KV for *dnaaf1*<sup>-/-</sup> 3SS (upper panel)  
 187 and *dnaaf1*<sup>-/-</sup> 8SS (lower panel). **(D)** Dot plot displaying the mean values of  $\varphi_{\text{avg}}$  on the left (in red) and on the right (in blue) sides of  
 188 the KV for WT<sub>3SS</sub>, WT<sub>9-14SS</sub>, and *trilobite*<sup>-/-</sup><sub>8SS</sub>. *trilobite*<sup>-/-</sup><sub>8SS</sub> display no difference between the mean  $\varphi_{\text{avg}}$  on the left and right sides of  
 189 the KV. The p-values result from a permutation test under the null hypothesis of  $\varphi_{\text{avg\_left}} = -\varphi_{\text{avg\_right}}$ . **(E)** Rosette plot showing the  $\varphi$   
 190 angle distribution of cilia in both KV hemispheres (left+right cilia) for *trilobite*<sup>-/-</sup> 8SS. In contrast to other conditions studied so far,  $\varphi_{\text{avg}}$   
 191 of *trilobite*<sup>-/-</sup> KV cilia is close to zero, reinforcing the observation that the KV is symmetrical at 8SS. **(F)** Schematics showing the  $\varphi_{\text{avg}}$   
 192 on the left and right sides of the KV for *trilobite*<sup>-/-</sup><sub>8SS</sub>. Nc = number of cilia.

193  
194 Ciliary components involved in cilia motility have also been shown to modulate cilia orientation (Jaffe et  
195 al., 2016). We thus assessed if cilia motility could be a factor controlling asymmetric cilia orientation. We  
196 first analyzed cilia orientation in the WT at 3SS and found that WT immotile cilia have a distinct  
197 orientation compared to the motile cilia at the same stage ( $\theta_{\text{avg\_WT3SS immotile}} = +15^\circ$  and  $\theta_{\text{avg\_WT3SS motile}} =$   
198  $+30^\circ$ ;  $p < 10^{-4}$ ), suggesting that motility could be involved in modulating cilia orientation. To confirm cilia  
199 motility involvement, we analyzed the effects *dna9* (*Ird1*) knock-down and found that asymmetric cilia  
200 orientation was perturbed (FigureS2A). We next studied the *dnaaf1*<sup>-/-</sup> (*dynein axonemal assembly factor*  
201 *1*; old nomenclature: *Irrc50 - leucine-rich repeat-containing protein 50*) mutants. *dnaaf1* encodes for a  
202 cilium-specific protein required for the stability of the ciliary architecture and when mutated abrogates its  
203 ability to interact with specific targets important for cilia motility (Sullivan-Brown et al., 2008). Importantly,  
204 *dnaaf1*<sup>-/-</sup> cilia have ultrastructural defects and display abnormal dynein arms orientation in beating cilia  
205 (Loges et al., 2009). We found that all cilia are immotile in the *dnaaf1*<sup>-/-</sup> KVs (Movie 1) and that LR axis  
206 establishment is randomized (Sup. Figure 4B-C and Table 2). We next assessed the symmetry in the  
207 *dnaaf1*<sup>-/-</sup> cilia and found that their orientation does not show any sign of asymmetry at 3SS ( $\varphi_{\text{avg\_left}} \approx -$   
208  $\varphi_{\text{avg\_right}}$ ) ( $\varphi_{\text{avg}} \approx 0^\circ$  in Figure 3A; Figure 3B-C and Table 1), similar to the controls at the same stage  
209 (Figure 2 and Sup. Figure 2B). At 8SS, we found that *dnaaf1*<sup>-/-</sup> cilia orientation is asymmetric ( $\varphi_{\text{avg\_left}} \neq -$   
210  $\varphi_{\text{avg\_right}}$  in Figure 3B-C and Table 1;  $\varphi_{\text{avg}} \neq 0^\circ$  in Figure 3A) showing that asymmetric cilia orientation is  
211 flow independent. Surprisingly though, we found that *dnaaf1*<sup>-/-</sup> cilia have a meridional tilt (Figure 3B) but  
212 are inclined in a sinistral direction, which is the opposite direction than WT at 8SS ( $\varphi_{\text{avg\_dnaaf1}^{-/8SS}} = -31^\circ$   
213 (Figure 3B) and  $\varphi_{\text{avg\_WT8SS motile}} = +11^\circ$  (Sup. Figure 2A);  $p < 10^{-5}$ . See also Figure 3A with  $\varphi_{\text{avg}} < 0^\circ$ ). Thus  
214 *dnaaf1* is involved in the control of chiral cilia orientation and it may do so independently of the flow.

215  
216 Finally, since cilia motility and planar cell polarity are interdependent (Jaffe et al., 2016), we directly tested  
217 the role of the PCP in KV chirality. It has been shown that the PCP pathway modulates cilia tilt in the  
218 mouse LRO (Hashimoto and Hamada, 2010; Marshall and Kintner, 2008; Song et al., 2010). Generically,  
219 PCP proteins are required to establish cell polarity within tissues across a large variety of animal species  
220 (Wallingford, 2012). We used the zebrafish *trilobite* mutant line, where Van Gogh/Strabismus homologue  
221 - *Van gogh-like 2* (*Vangl2*) -, a gene encoding a protein essential for PCP signalling, is mutated (Jessen  
222 and Solnica-Krezel, 2004). *Vangl2* function is required for the posterior tilt observed in KV cilia, and  
223 anomalies in cilia orientation disrupt the cilia-driven flow and LR determination (Borovina et al., 2010).  
224 After confirming the *trilobite*<sup>tc240a</sup> have left-right defects (Sup. Figure 4B-C and Table 2), we studied cilia  
225 orientation at 8SS using *trilobite*<sup>tc240a</sup>; *actb2:Mmu.Arl13b-GFP* (Heisenberg and Nusslein-Volhard, 1997)  
226 mutant embryos, and found cilia orientation still follows a meridional tilt (Figure 3E and Sup. Figure 1A).  
227 Our flow simulations (see Methods and Sup. Figure 4D) predict that flow is significantly weaker in  
228 *trilobite*<sup>tc240a</sup> than in the WT ( $p=0.024$ ), as expected for a PCP mutant (Borovina et al., 2010). In contrast  
229 with other conditions studied so far, permutation tests could not detect any asymmetry in the *trilobite*<sup>-/-</sup> KV  
230 cilia at 8SS, meaning  $\varphi_{\text{avg\_left}} = -\varphi_{\text{avg\_right}}$  ( $p=0.54$ , Figure 3D,E, Sup. Figure 2C and Table 2) with a  $\varphi_{\text{avg}} \approx$



231 0° (Figure 3A). Altogether, these results indicate that the PCP pathway is involved in chiral cilia  
232 orientation in the KV.

233

234 Since PCP is known to alter the basal body position at the cell surface of the vertebrate LRO (Borovina et  
235 al., 2010; Hashimoto and Hamada, 2010; Juan et al., 2018; Song et al., 2010), we developed a  
236 quantitative analysis of basal cilia orientations in the KV to test if both are interdependent (Sup. Figure  
237 3B-C). As expected, we found that the basal body is localized posteriorly along the anterior-posterior (AP)  
238 axis of the WT embryo and is symmetrical along the left-right axis of the cell (Figure 4A, C, D). We next  
239 assessed the AP position of the cilia in the *dnaaf1* mutants and found that it is altered along the AP axis,  
240 with basal body located more centrally to the cell (Figure 4 A-D), in line with the finding that  
241 Dnaaf1/Lrrc50 interacts physically with C21orf59, which is involved in polarizing motile cilia (Jaffe et al.,  
242 2016). By contrast, we did not detect any chirality in the basal body AP or right-left (RL) positions when  
243 testing the positions of right cilia against the mirror image of left cilia in controls and mutants ( $p>0.15$ ).  
244 Thus, the chirality of cilia orientation seems not dependent on basal body positioning along the LR axis of  
245 the cells, which more generally suggests cilia orientation is not solely controlled by basal body position. In  
246 addition, these results show that *dnaaf1* is involved in setting AP basal position and that cells might need  
247 to be properly planar polarized for the establishment of chiral cilia orientation. Overall, we conclude that  
248 proper cilia positioning along the AP axis of the cell and asymmetric cilia orientation might be  
249 interdependent.

250

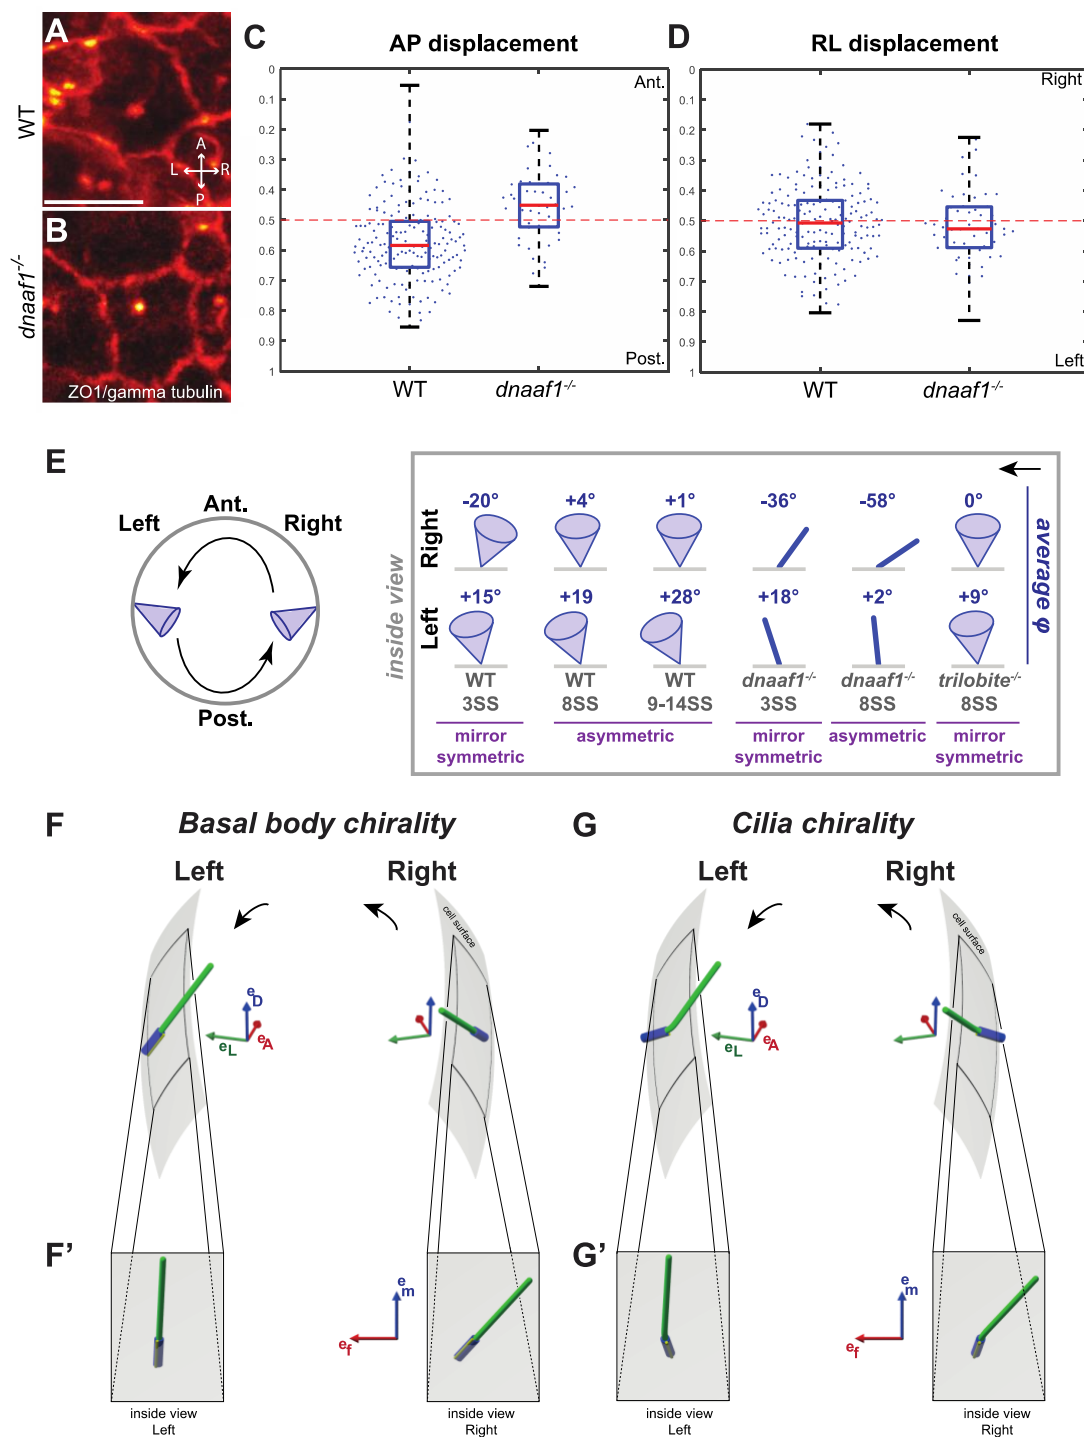

**Figure 4**

251  
 252 **Figure 4: Basal body position in KV cells, schematic summary of the contributions of different pathways and the potential**  
 253 **origins of chirality leading to asymmetric cilia orientation in the KV. (A-D) Basal body position analysis. The positions of the**  
 254 **cilia basal body relative to the AP (Anterior-to-posterior) or LR (Left-to-right) extension of each cell were extracted from WT (A) or**  
 255 ***dnaaf1*<sup>-/-</sup> embryos (B) using an orthogonal projection of the fluorescence intensity on the plane tangential to the KV surface after**

256 ZO1 and gamma tubulin staining of KV cells. The distributions of AP displacement (dots from 0 for anterior to 1 for posterior in **(C)**)  
257 and LR displacement (dots from 0 for right to 1 for left in **(D)**) are centered at the middle of the cell (displacement at 0.5) for all  
258 cases, except a significant posterior displacement of basal bodies in the WT. **(E)** Left: Dorsal view of a mirror-symmetric KV showing  
259 a representative cilium on the left and on the right side. Right: schematic view of the average  $\phi$  orientation over time in WT, *dnaaf1*<sup>-/-</sup>  
260 and *trilobite*<sup>-/-</sup> KV for cilia in the right (upper row) and in the left (lower row) KV hemispheres. KV is mirror-symmetric at 3SS both in  
261 WT and *dnaaf1*<sup>-/-</sup> embryos evolving to an asymmetric orientation at 8SS. In contrast, *trilobite*<sup>-/-</sup> 8SS KVs do not show any evidence of  
262 asymmetry. **(F-G)** Schematics of the two hypotheses for the observed chirality (dorsal-posterior views of the KV in F and G, inside  
263 views of both sides in F' and G'): **(F)** the orientation of cilia can be asymmetric between left and right because the orientation of the  
264 basal bodies is chiral; **(G)** alternatively, the basal bodies can be arranged symmetrically, but the intrinsic chiral structure of each  
265 cilium leads to an overall asymmetric distribution of cilia orientations. The black arrows in E, F and G indicate the direction of the  
266 flow.

267

## 268 Discussion

269 Previous work has focused on identifying signals that trigger the specification of the left embryonic side in  
270 response to flow, but the chirality of the LRO remained untested. We took advantage of the zebrafish  
271 LRO (KV) as an established model system in which cilia orientation and LR symmetry can be accurately  
272 quantified and show that cilia orientation is not symmetrical between the left and right side of the LRO.  
273 Our study revealed that cilia orientation progressively changes from mirror-symmetric to asymmetric  
274 (Figure 4E) and that this new type of asymmetry emerges independently of the LR symmetry cascade.  
275 Interestingly, even if we found that there is a strong variability in cilia orientation, we found that they will  
276 invariably become chiral in every KV, suggesting a very robust process for chirality determination.

277

278 Considering that several key modulators of symmetry breaking such as Pkd2, Rock2b (and the  
279 associated actomyosin pathway) or Spaw do not affect cilia orientation, we conclude that the LRO  
280 promotes left-right symmetry breaking and asymmetric cilia orientation through distinct mechanisms. If  
281 the asymmetry of cilia orientation is independent of the LR machinery, how can we explain its  
282 emergence? One possibility would be that cilia reorient themselves in response to the flow so that the  
283 flow forces themselves would be the source of chiral information. During blood vessel morphogenesis,  
284 endothelial cells polarize themselves against the flow in a similar way (Franco et al., 2015; Kwon et al.,  
285 2016). There are, however, three strong arguments opposing this hypothesis. First, we still observe an  
286 asymmetric orientation of cilia in *dnaaf1* mutants where flow is absent and in *rock2b* knockdown where  
287 flow is weak. Second, our previous work (Ferreira et al., 2017) along with our simulations (Sup. Figure  
288 4E) show that the torque resulting from the global flow is much smaller than the drag on a motile cilium. A  
289 similar conclusion has been drawn when comparing the forces exerted on cells by beating ependymal  
290 cilia with those mediated by the fluid (Mahuzier et al., 2018). Finally, we found that the left cilia reorient  
291 less than the right cilia even though the flow has the same magnitude on both sides (Ferreira et al.,  
292 2017). It seems thus that the relationship between flow direction and cilia orientations cannot be causal. It  
293 is more likely that both could reflect disorders in cilia orientation in the respective mutants.

294

295 Rather than being induced by the flow, we propose that the asymmetry could arise from chiral influences  
296 generated by the cytoskeletal components that operate at the cellular and subcellular scales (Satir, 2016).  
297 In line with this idea is the fact that cells can display chiral behaviours *in vitro* and *in vivo* independently of  
298 a LRO (Naganathan et al., 2014; Noel et al., 2013; Speder et al., 2006; Tee et al., 2015). For example,  
299 basal body and cilia ultra-structure display obvious signs of chirality (Afzelius, 1976; Marshall, 2012;  
300 Pearson, 2014). This suggests two possibilities: either the orientation of the cilia basal bodies is chiral  
301 (asymmetric between left and right, Figure 4F-4F'), or they are oriented symmetrically and the intrinsic  
302 chiral structure of each cilium leads to an overall asymmetric distribution of cilia orientations (Figure 4G-  
303 4G'). The fact that *dnaaf1*, a cilia specific protein, can reverse cilia orientation from dextral to sinistral  
304 seems to argue for the latter. However, we found that *dnaaf1* is also involved in modulating planar cell  
305 polarity, so its function within the cilium remains difficult to assess. Interestingly, we did not detect chirality  
306 in the distribution of basal body positions. This suggests that the chirality is related to the basal body  
307 orientation but not its position. An attractive hypothesis is that cells need to be planar cell polarized to  
308 express chirality and that the PCP (through Vangl2 and Dnaaf1) participates in the process that sets  
309 basal body orientation. Among the many PCP components that affect LR determination (see for example  
310 ciliary components (Jaffe et al., 2016) or unconventional myosin 1d (Juan et al., 2018; Tingler et al.,  
311 2018)), it will be interesting to assess if some are more important than others in controlling cilia chirality  
312 and the robustness of cilia orientation. More work will be needed to establish the molecular basis of cell  
313 and cilia chirality in the KV and whether it is conserved in other ciliated LRO.

314  
315 The demonstration that the asymmetry is actively modulated by the PCP, cilia motility and, potentially, by  
316 the internal organization of cilia has important implications for the understanding of chiral information  
317 distribution and its control in developing organs. First, it shows that chiral information is dynamic and  
318 temporally controlled during the course of LR specification. In that respect, it is interesting that cells  
319 establish chiral organization as a result of cell migration *in vitro* (Wan et al., 2011) and that asymmetric  
320 cell migration is well described in the chicken LRO (Gros et al., 2009). It is thus possible that the  
321 progressive establishment of asymmetric cilia orientation in the LRO reflects an active acquisition of  
322 cellular chirality during the time of LRO function. If confirmed, chirality would represent a unique  
323 conserved feature between fish and chicken LRO. This raises the intriguing possibility of a more general  
324 role of chirality in morphogenetic pattern formation and LR symmetry breaking. Could the chiral cilia  
325 orientation participate in symmetry breaking in the LRO? We have previously tested different hypothetical  
326 mechanisms of flow detection and shown that a quantitative analysis of physical limits favours chemical  
327 sensing (Ferreira et al., 2017). While the basic mechanism of flow generation, as well as flow detection,  
328 do not require any prior asymmetry in the KV, we cannot exclude that the ciliary asymmetry participates in  
329 the process of symmetry breaking by playing hand-in-hand with the chiral flow to optimize the flow  
330 direction or the detection of signalling particles.

331

332 More generally, proper cilia orientation is essential for directed flow generation in ciliated tissues or for  
333 swimming in ciliated microorganisms (Goldstein, 2015). An important open question is whether cilia can  
334 reorient themselves in the direction of flow (Guirao et al., 2010; Mitchell, 2003) and if so, whether this  
335 reorientation is a consequence of hydrodynamic forces. Another possibility is that cell polarity is affected  
336 by the flow. Since some ciliary proteins involved in cilia motility also participate in planar cell polarity (Jaffe  
337 et al., 2016), it is possible that the spatial orientation of motile cilia is an intrinsic mechanism, which is  
338 independent of the flow they generate. In the case of brain cavities, the orientation of cilia beating  
339 dynamically follows the circadian rhythm and may be driven by transient changes in cell-cell interactions  
340 and in PCP (Faubel et al., 2016). Similarly, ciliated microorganisms can reorient the direction of ciliary  
341 beating in the course of an avoidance reaction (Tamm et al., 1975). Mechanical strain has also been  
342 shown to be involved in dictating cilia orientation, length and motility features (Chien et al., 2018). Our  
343 study sheds a different light on these systems as it shows that cilia orientation is related to cell polarity in  
344 a complex way that includes an intrinsic sense of chirality. Furthermore, as there is increasing evidence  
345 that congenital diseases like idiopathic scoliosis (Grimes et al., 2016), *Kartagener* syndrome, neonatal  
346 respiratory distress, hydrocephaly, and male infertility involve cilia motility (Mitchison and Valente, 2017),  
347 precise cilia orientation analysis becomes critical to understand the biological principles that govern cilia  
348 function and their potential involvement in pathology. In this context, our conclusions and method could  
349 be relevant in the studies of a variety of developing organs.

350

351



352

## 353 **Materials and Methods**

### 354 **Zebrafish strains**

355 The zebrafish (*Danio rerio*) lines used in this study were the following: *Tg(actb2:Mmu.Arl13b-GFP)*  
356 (Borovina et al., 2010), *Tg(dnaaf1<sup>tm317b</sup>; actb2:Mmu.Arl13b-GFP)* (Sullivan-Brown et al., 2008),  
357 *Tg(trilobite<sup>tc240a</sup>; actb2:Mmu.Arl13b-GFP)* (Heisenberg and Nusslein-Volhard, 1997), *Tg(spaw<sup>s457</sup>;*  
358 *actb2:Mmu.Arl13b-GFP)* (Kalogirou et al., 2014), *Tg(cup<sup>tc241</sup>; actb2:Arl13b-GFP)* (Schottenfeld et al.,  
359 2007). None of the mutant lines display cilia length or KV shape defects (Sup. Figure 1B-C). All zebrafish  
360 strains were maintained at the IGBMC fish facility under standard husbandry conditions (14h light/10h  
361 dark cycle). Adult fish were anaesthetized with 80µg/mL Tricaine/MS-222 (Sigma, Cat. # A-5040) for  
362 genotyping experiments. The Animal Experimentation Committee of the Institutional Review Board of  
363 IGBMC approved all animal experiments performed in this project.

364

### 365 **Morpholino (MO) knockdown**

366 MO designed to block the *rock2b* RNA splicing site (Wang et al., 2011) was obtained from *Gene Tools*,  
367 *LLC*. One-cell stage embryos were injected with 0.66ng of *rock2b*-MO (5'-  
368 GCACACACTCACTCACCAGCTGCAC-3').

369

### 370 **Blebbistatin treatment**

371 Embryos were dechorionated and treated with 35µM of Blebbistatin (SIGMA B0560/DMSO) from bud-  
372 stage until 3SS when they were washed in 0.3% Danieau medium and kept at 32°C until the desired  
373 stage for live imaging (8SS). 1%-DMSO treated embryos were used to monitor potential drug-control  
374 effects.

375

### 376 **2-photon excited fluorescence (2PEF) microscopy**

377 Live imaging experiments were performed as described in (Ferreira et al., 2017), in order to maximize the  
378 scanning artefact that allows to properly reconstruct cilia orientation in 3D as described in (Supatto and  
379 Vermot, 2011).

380

### 381 **3D-Cilia Map: quantitative 3D cilia feature mapping**

382 We used *3D-Cilia Map*, a quantitative imaging strategy to visualize and quantify the 3D biophysical  
383 features of all endogenous cilia in the Kupffer's vesicle (KV) in live zebrafish embryos, such as KV size  
384 and shape and cilia density, orientation or motility. This image analysis workflow using Imaris (Bitplane  
385 Inc.) and custom-made scripts in Matlab (The MathWorks Inc.) was first described in (Ferreira et al.,  
386 2017). We improved its automation to facilitate the analysis of a large number of cilia. In addition, we  
387 added new feature quantification, such as the length of both motile and immotile cilia, which is estimated  
388 based on the radial fluorescence intensity profile originating from the position of each cilium basal body.

389 All coordinate system definitions are described by (Ferreira et al., 2017). In particular, the cilium  
390 orientation is represented as a unit vector from its base to its tip, with angle  $\theta$  and  $\varphi$  defined in a local  
391 basis (Fig 1B). This vector represents the orientation of the rotation axis of motile cilia or of the cilium  
392 body orientation in the case of immotile cilia, which are both obtained from experimental images. The  
393 average angles  $\varphi_{\text{avg}}$  and  $\theta_{\text{avg}}$  used throughout this work describe the direction of the 3D resultant vector,  
394 which is the sum of all considered cilia unit vectors.

395

### 396 **Whole-mount *in situ* hybridization (WISH)**

397 Whole-mount *in situ* hybridization was performed as described previously (Thisse and Thisse, 2008).  
398 Digoxigenin RNA probes were synthesized from DNA templates of *spaw* (Long, 2003) and *foxA3*  
399 (Monteiro et al., 2008). Embryos for *spaw* and *foxA3* WISH were fixed at 17SS and 53 hours post  
400 fertilization (hpf) respectively. The zebrafish heart looping was assessed at 48hpf when the heart is  
401 already beating. Due to its transparency, the heart loop can be visible using brightfield illumination. We  
402 performed WISH for *foxA3* at 53hpf in order to visualize the gut *situs* (Monteiro et al., 2008) in the same  
403 embryos in which we previously assessed the heart looping at 48hpf. Embryos were evaluated after  
404 WISH and scored according to the curvature between the liver and the pancreas. For the sake of  
405 simplicity, we merged the laterality information of both heart and gut and described it according to the  
406 clinical terminology: *situs solitus* (heart and gut with normal orientation), *situs inversus* (complete reversal  
407 of both organ laterality) and *heterotaxy* (any combination of abnormal LR asymmetries that cannot be  
408 strictly classified as *situs inversus*) (Fliegauf et al., 2007; Ramsdell, 2005; Shapiro et al., 2014; Sutherland  
409 and Ware, 2009). *Spaw* expression patterns in the lateral plate mesoderm (LPM) can be classified into  
410 four main categories: left, bilateral, right or absent (Sup. Figure 4A)(Long, 2003). After scoring, embryos  
411 were individually genotyped.

412

### 413 **Immunohistochemistry**

414 Embryos at 8SS were fixed by MEMFA (3.7% formaldehyde, 0.1M MOPS, 2mM EGTA, 1mM MgSO<sub>4</sub>) for  
415 2h at room temperature (RT). Embryos were changed to 100% Methanol and stored at -20°C overnight  
416 (OV). After rehydration, embryos were washed in PBBT (PBS with 2mg/mL BSA and 0.1% TritonX-100)  
417 and blocked in PBBT with 10% goat serum at RT. Subsequently, embryos were incubated OV at 4°C with  
418 primary antibodies - 1:50 mouse anti-ZO1 antibody (33-9100, *Thermo Fisher Scientific*) and 1:200 mouse  
419 anti-gamma tubulin antibody (T6557, *Millipore Sigma*). After, embryos were washed with PBBT, followed  
420 by blocking solution, and incubated overnight at 4°C with secondary antibody - 1:300 anti-mouse Alexa  
421 Fluor 546 IgG (A-11030, *Thermo Fisher Scientific*). Embryos were finally washed with PBBT and stored in  
422 PBS at 4°C. For imaging, single embryos were flat mounted onto the dish and imaged in a TCS SP8  
423 confocal microscope (*Leica Microsystems*).

424

### 425 **Quantifications and statistical analysis**

426 To statistically test the mirror-symmetry in the KV, we used a permutation test (also called randomization  
427 test) (Hesterberg T, 2005). We compute the statistic  $|\varphi_{\text{avg\_left}} - \varphi_{\text{avg\_right mirror}}|$ , where  $\varphi_{\text{avg\_left}}$  is the  $\varphi$  angle of  
428 the average resultant vector of left cilia and  $\varphi_{\text{avg\_right mirror}}$  is the  $\varphi$  angle of the resultant vector of right cilia  
429 after LR mirror symmetry. This statistic is based on the definition of chirality as we test if the left cilia  
430 orientation superimposes with the mirror image of right cilia. Left and right labels of cilia are then  
431 randomly permuted 300,000 times to construct the sampling distribution of possible  $|\varphi_{\text{avg\_left}} - \varphi_{\text{avg\_right}}$   
432  $_{\text{mirror}}|$  values. The p-value is finally estimated as the proportion of permutations resulting in values greater  
433 than or equal to the experimental one. We define the structure of the KV as chiral (or asymmetric) when  
434 the p-value is lower than 0.05 and the null hypothesis ( $\varphi_{\text{avg\_left}} = \varphi_{\text{avg\_right mirror}}$ ) can be rejected. The same  
435 test is used to investigate  $\theta$  mirror-symmetry. The p-values of the effective angular velocity vector ( $\bar{\Omega}$ ) of  
436 all conditions against the WT were calculated using Welch's test on the dorsal component  $\Omega_D$ .

437

### 438 **Fluid dynamic simulations**

439 We characterized the circulatory flow in the KV by calculating the effective angular velocity vector ( $\bar{\Omega}$ ) as  
440 described in (Ferreira et al., 2017). We described each cilium in a KV as a chain of beads moving along a  
441 tilted cone with the orientation obtained from 3D-CiliaMap and calculated the flow using Green's function  
442 for the Stokes equation in the presence of a spherical no-slip boundary. The effective  $\bar{\Omega}$  is defined as the  
443 angular velocity of a rotating rigid sphere with the same angular momentum as the time-averaged flow in  
444 the KV.

445

### 446 **Analysis of cilia basal body positions**

447 Embryos at 8SS were fixed by MEMFA and labeled with anti-ZO1 and anti-gamma tubulin antibodies,  
448 followed by Alexa Fluor 546 IgG labeling (detailed protocol in "Immunohistochemistry" method section).  
449 Samples were imaged in a TCS SP8 confocal microscope (*Leica Microsystems*). Cilia basal bodies were  
450 segmented in 3D from fluorescence images using Imaris (Bitplane Inc.). A local reference frame at the  
451 origin of each basal body was defined to identify the local tangent plane to the vesicle in 3D. Using  
452 custom-made scripts in Matlab (The MathWorks Inc.), the fluorescence intensity of pixels up to  $2\mu\text{m}$  away  
453 from it was orthogonally projected on this plane (Sup. Figure 3B) to manually draw the cell contour and  
454 extract the antero-posterior and left-right extension of the cell. The relative position of the basal body  
455 relatively to them has then been calculated for every cilium as shown in Sup. Figure 3B-C.

456

457

458 **Supplementary figures**

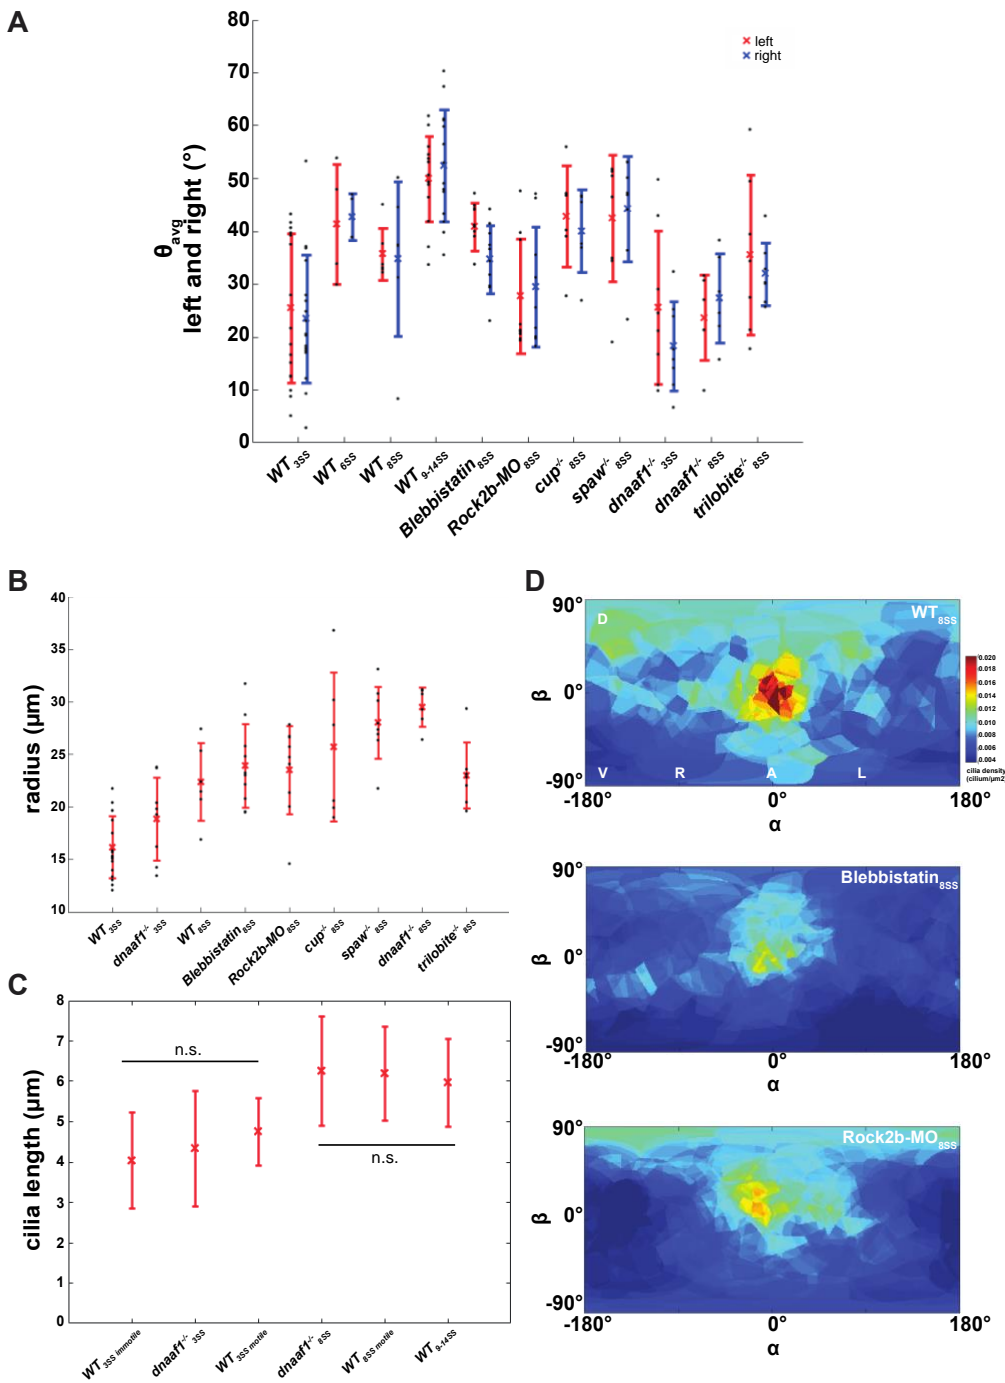

**Supplemental Figure 1**

459

460 **Sup. Figure 1: Distribution of  $\theta$  angles on the right and on the left sides of the KV and additional information about the KV**  
 461 **size, cilia length and cell density in different experimental conditions. (A) Dot plot displaying the mean values of  $\theta_{avg}$  on the left**  
 462 **(in red) and on the right (in blue) sides of the KV for all conditions. Permutation tests show there are no signs of asymmetry relating**  
 463 **to  $\theta_{avg}$  in all conditions studied ( $p > 0.05$ ). (B) Average KV radius for WT and other conditions analyzed, at 3 and 8SS. The average**

464 KV radius shows no significant difference between conditions from the same developmental stage. **(C)** Average cilia length of WT  
465 immotile and motile cilia and *dnaaf1*<sup>-/-</sup> immotile cilia, at 3- and 8SS. There is no significant difference between the average cilia  
466 length of WT and *dnaaf1*<sup>-/-</sup> KV cilia. **(D)** Averaged cilia density obtained from KVs of WT, blebbistatin, and rock2b-MO represented  
467 on a 2D flat map revealing a disruption of the steep density gradient along the anteroposterior (AP) axis observed in WT  
468 (enrichment at the anterior pole - in red).



Supplemental Figure 2

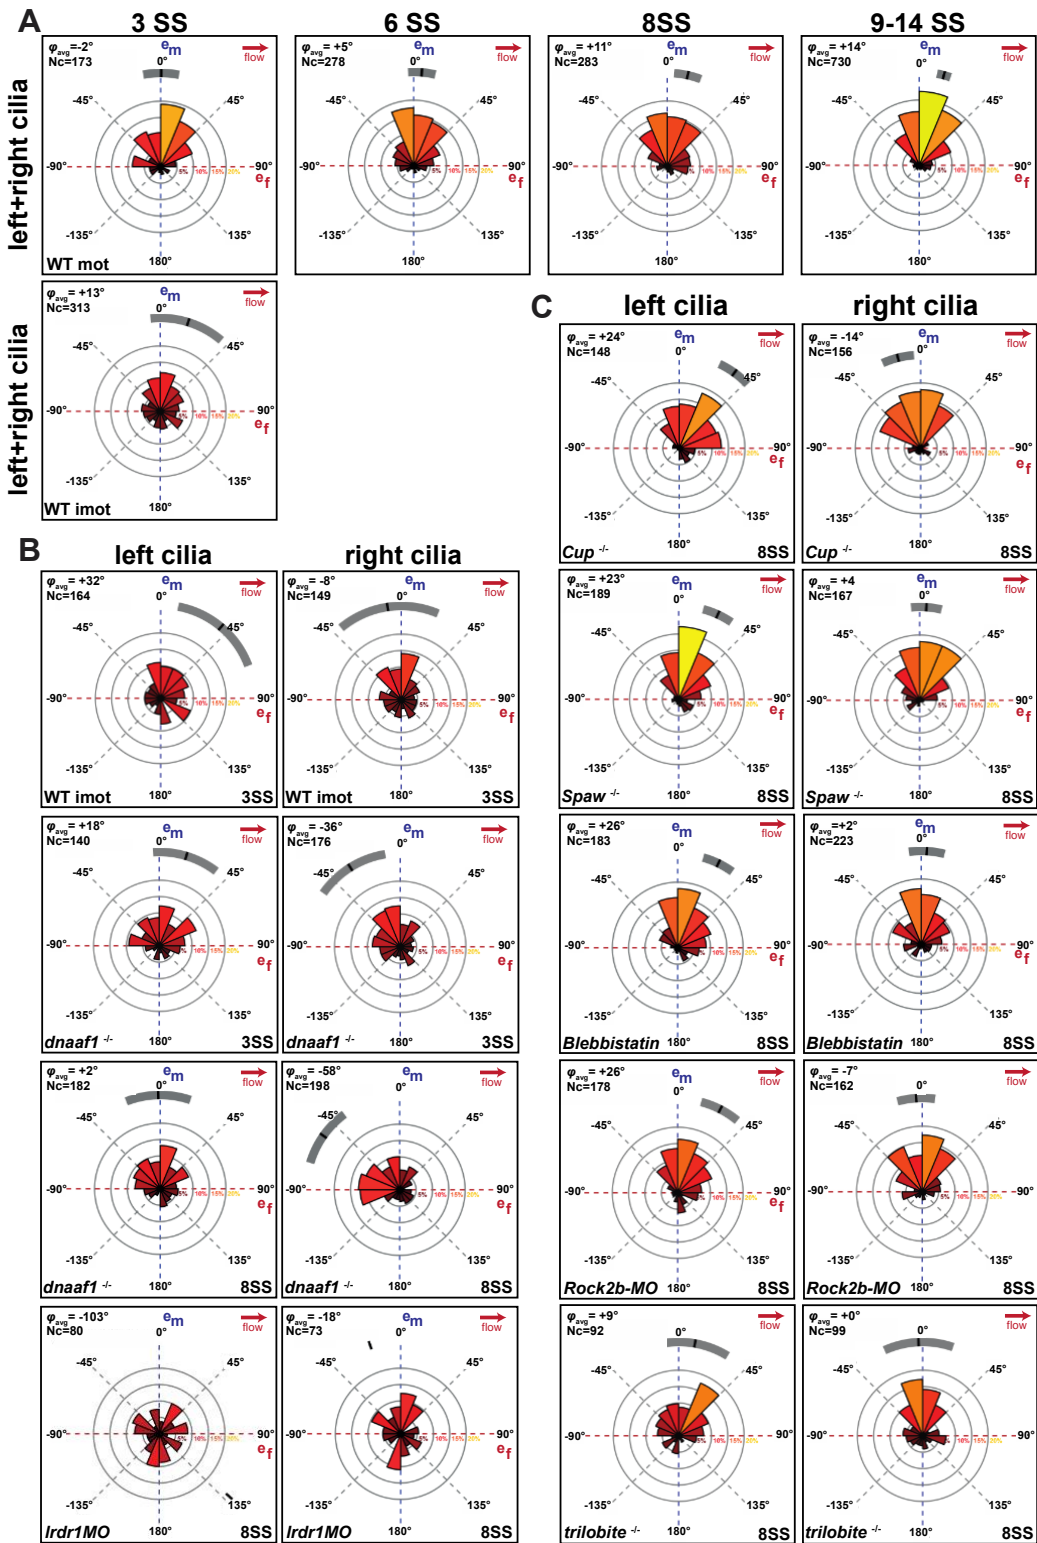

469  
470  
471  
472

Sup. Figure 2: Additional information about  $\varphi$  angle distributions displayed in rosette plots. Rosette plots showing the  $\varphi$  angle distribution and  $\varphi_{avg}$  values of cilia in both KV hemispheres (left+right cilia) for WT cilia at different stages (A), and left and right separately for the immotile cilia population in both WT, *dnaaf1<sup>-/-</sup>* and *lrd1-MO* (B) and for the *cup<sup>-/-</sup>*, *spaw<sup>-/-</sup>*, blebbistatin, *rock2b-MO*

473 and *trilobite*<sup>-/-</sup> conditions (C). All conditions presented asymmetric KVs at 8SS, with the exception of *trilobite*<sup>-/-</sup>, which is mirror-  
 474 symmetric like KVs analyzed at 3SS and 6SS. Statistics provided in Table 1. Nc = number of cilia

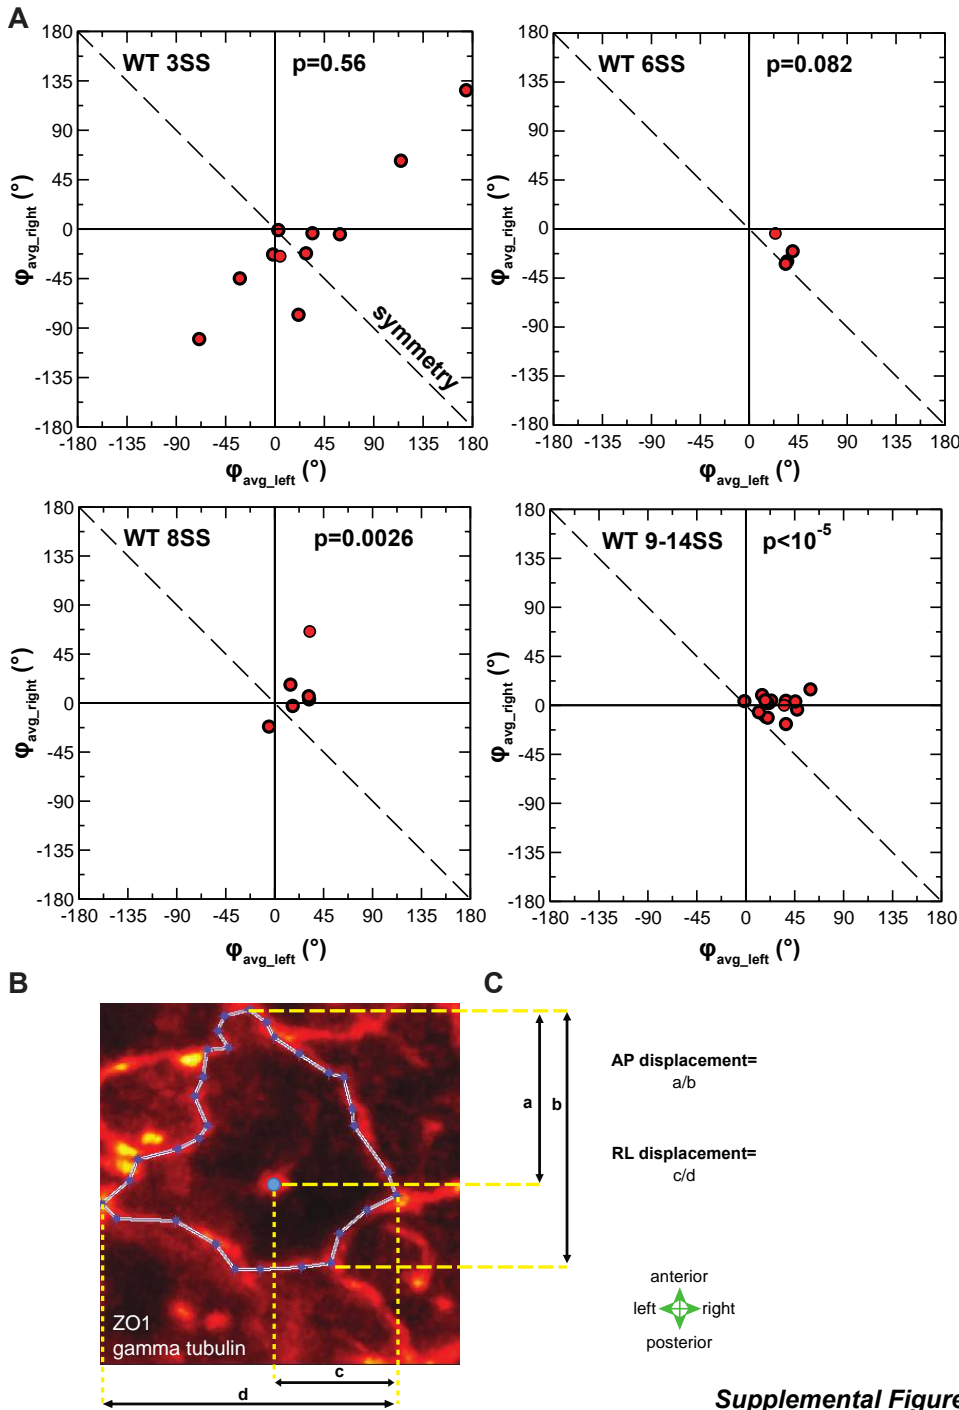

**Supplemental Figure 3**

475  
 476 **Supplemental Figure 3: Asymmetry of cilia orientations in individual WT embryos at different stages and basal body**  
 477 **localization quantification.** (A) Plot showing the average orientation ( $\phi_{\text{avg}}$ ) in the right- vs. the left half of the KV at a given stage. In  
 478 a symmetric KV, the points would lie on the dashed line, indicating  $\phi_{\text{avg\_right}} = -\phi_{\text{avg\_left}}$ . Although the variability among embryos remains  
 479 large, all 14 KVs at the later stage display an asymmetry with the same sign. The p-values (obtained from a permutation test)  
 480 indicate the likelihood that an intrinsically symmetric KV (null hypothesis) would randomly show the same or larger degree of  
 481 asymmetry. (B-C) Quantification of basal body position relative to the KV cell extent. (B) Orthogonal projection of the fluorescence

482 intensity on the plane tangential to the KV surface. Basal body position (large blue dot) and cell contour (small blue dots connected  
483 with white lines) are used to measure the anterior-to-posterior and right-to left cell extents (b and d values, respectively) and the  
484 anterior-to-basal body and right-to-basal body distances (a and c values, respectively). **(C)** The anterior-to-posterior (AP) and right-  
485 to-left (RL) basal body relative positions are then estimated as  $a/b$  and  $c/d$ , respectively.

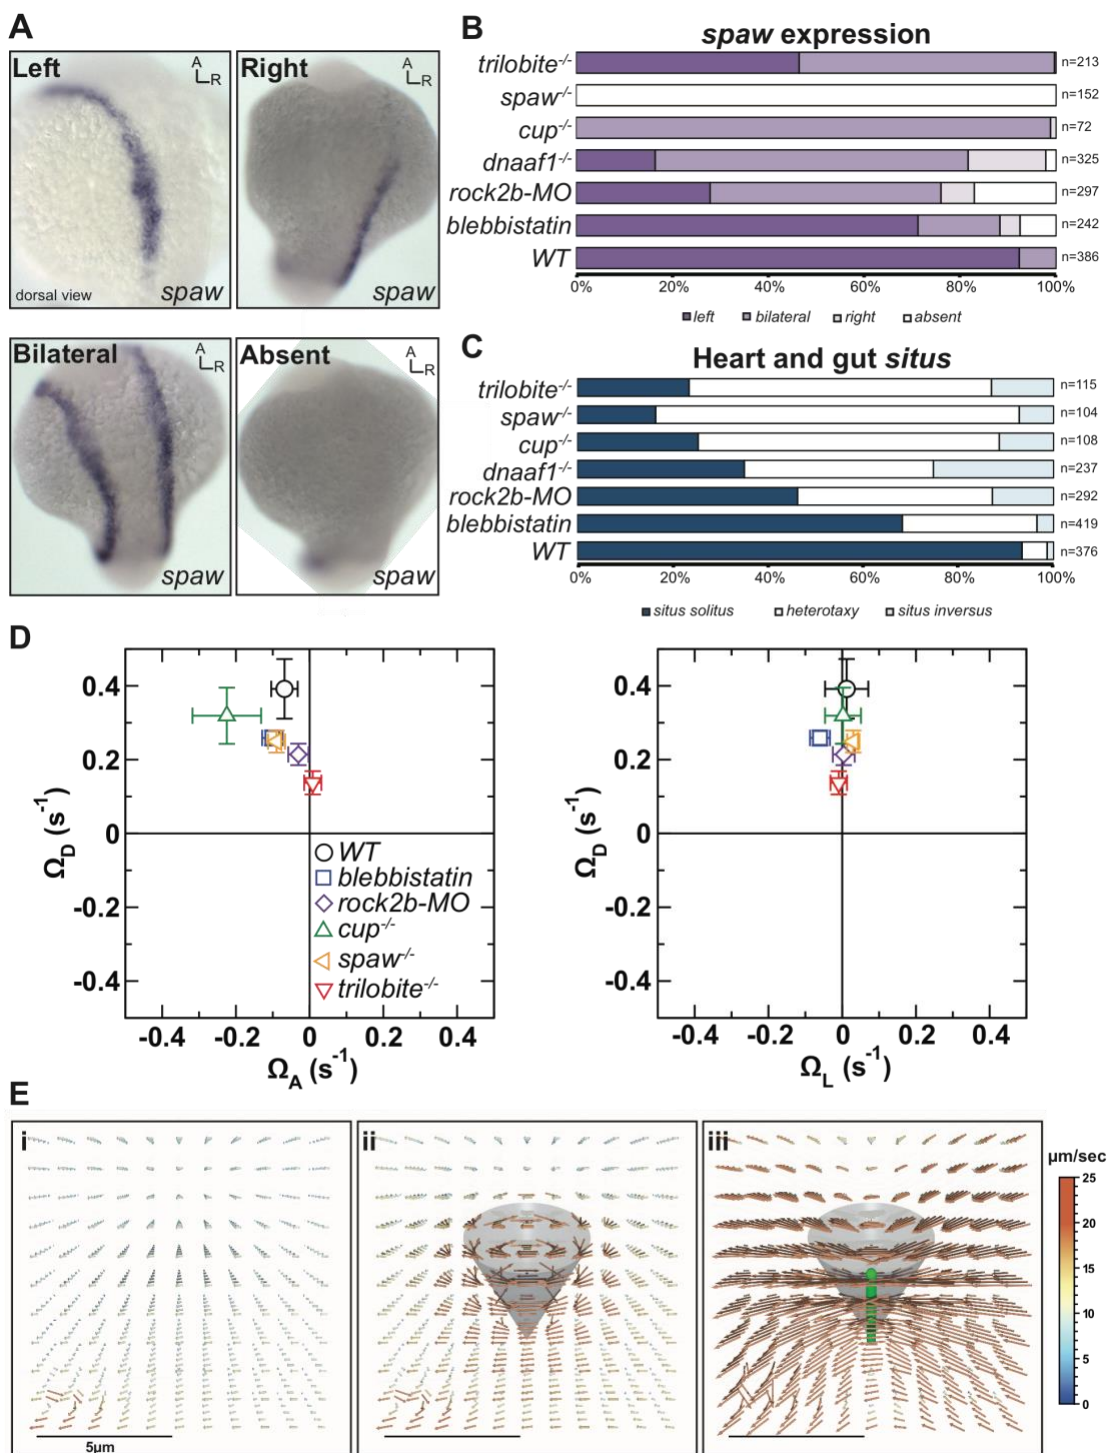

**Supplemental Figure 4**

486  
 487 **Supplemental Figure 4: Quantification of the *spaw* expression patterns in the LPM and heart and gut *situs* in all conditions**  
 488 **studied and flow profiles around simulated beating cilia. (A)** *spaw* expression patterns in the LPM can be divided in left,  
 489 bilateral, right or absent. **(B-C)** Percentages of *spaw* expression patterns in the LPM **(B)** and the *situs* phenotypes **(C)** respectively.

490 The number of embryos analyzed is displayed next to each bar. *Situs* phenotypes are classified according to the clinical terminology  
 491 in *situs solitus*, *heterotaxy* and *situs inversus*. **(D)** Effective angular velocity ( $\bar{\Omega}$ ) of the flow in the KV, determined computationally  
 492 from cilia orientations and motility. The main graph shows the right view of the  $\bar{\Omega}$  (dorsal vs. left anterior component), the insets  
 493 show the anterior view (dorsal vs. left component). In contrast with the other conditions, *trilobite*<sup>-/-</sup> embryos have a significantly  
 494 weaker flow (p=0.024) when compared to WT at 8SS. **(E)** Flow around a cilium located at the right pole of the vesicle, determined in  
 495 a simulation with a randomly generated ("synthetic") cilia distribution, see (Ferreira et al., 2017) viewed from the center of the KV: i)  
 496 time-averaged flow if the central cilium is removed and all others preserved, such that only the global flow remains, ii) time-averaged  
 497 flow, iii) instantaneous flow. The results show that the global circulatory flow is much weaker than the local flows around a moving  
 498 cilium.

**Table 1**

| Mirror-symmetry: $\varphi_{\text{Left}} = -\varphi_{\text{right}}$ ? | WT 3SS       |                | WT    | WT    | WT     | <i>dnaaf1</i> <sup>-/-</sup> | <i>dnaaf1</i> <sup>-/-</sup> | Blebbistatin | <i>rock2b-MO</i> | <i>cup</i> <sup>-/-</sup> | <i>spaw</i> <sup>-/-</sup> | <i>trilobite</i> <sup>-/-</sup> |
|----------------------------------------------------------------------|--------------|----------------|-------|-------|--------|------------------------------|------------------------------|--------------|------------------|---------------------------|----------------------------|---------------------------------|
|                                                                      | motile cilia | immotile cilia | 6SS   | 8SS   | 9-14SS | 3SS                          | 8SS                          | 8SS          | 8SS              | 8SS                       | 8SS                        | 8SS                             |
| p value                                                              | 0.56         | 0.23           | 0.082 | 0.003 | <0.001 | 0.23                         | <0.001                       | <0.001       | 0.014            | <0.001                    | <0.001                     | 0.54                            |

**Table 2**

|                       | WT controls | blebbistatin | rock2b MO   | <i>dnaaf1</i> <sup>-/-</sup> | <i>cup</i> <sup>-/-</sup> | <i>spaw</i> <sup>-/-</sup> | <i>trilobite</i> <sup>-/-</sup> |
|-----------------------|-------------|--------------|-------------|------------------------------|---------------------------|----------------------------|---------------------------------|
|                       | Mean ± SEM  | Mean ± SEM   | Mean ± SEM  | Mean ± SEM                   | Mean ± SEM                | Mean ± SEM                 | Mean ± SEM                      |
| left                  | 92.3 ± 4.0% | 71.2 ± 2.5%  | 27.9 ± 1.3% | 16.5 ± 5.1%                  | 0 ± 0%                    | 0 ± 0%                     | 46.5 ± 7.3%                     |
| bilateral             | 7.7 ± 4.0%  | 17.1 ± 4.8%  | 48.1 ± 4.0% | 65.2 ± 11.1%                 | 98.8 ± 1.2%               | 0 ± 0%                     | 53.2 ± 6.9%                     |
| right                 | 0 ± 0%      | 4.2 ± 1.1%   | 6.9 ± 0.5%  | 16.1 ± 5.1%                  | 1.2 ± 1.2%                | 0 ± 0%                     | 0 ± 0%                          |
| absent                | 0 ± 0%      | 7.5 ± 1.3%   | 17.1 ± 5.9% | 2.2 ± 1.3%                   | 0 ± 0%                    | 100 ± 0%                   | 0.3 ± 0.4%                      |
| <i>situs solitus</i>  | 93.4 ± 0.6% | 68.3 ± 4.3%  | 46.3 ± 3.0% | 35.1 ± 1.4%                  | 25.5 ± 4.6%               | 16.5 ± 0.6%                | 23.5 ± 0.2%                     |
| <i>heterotaxy</i>     | 5.3 ± 0.9%  | 28.3 ± 2.9%  | 40.9 ± 1.8% | 39.6 ± 0.6%                  | 63.5 ± 4.6%               | 76.3 ± 1.7%                | 63.5 ± 0.6%                     |
| <i>situs inversus</i> | 1.3 ± 0.3%  | 3.5 ± 1.3%   | 12.9 ± 1.2% | 25.3 ± 1.2%                  | 11.5 ± 0.4%               | 7.2 ± 2.3%                 | 13.0 ± 0.4%                     |

**Table 3**

| Line ID                                                                 | References                                | Genotype                        |             |            |                  |
|-------------------------------------------------------------------------|-------------------------------------------|---------------------------------|-------------|------------|------------------|
|                                                                         |                                           | Primer sequences                | PCR primers | Sequencing | Mutation         |
| <i>cup</i> <sup>tc321</sup> ; <i>actb2</i> :Mmu. <i>Arl13b</i> -GFP     | Schottenfeld et al., 2007                 | PF1 : CCATTAGCCTGCACATTC AATC   | PF1/PR1     | PF1        | TGTT(A)GTGGGATAC |
|                                                                         |                                           | PR1 : ATCGCACTGCTCATCTGAAG      |             |            |                  |
| <i>dnaaf1</i> <sup>tm317b</sup> ; <i>actb2</i> :Mmu. <i>Arl13b</i> -GFP | Sullivan-Brown et al., 2008               | PF1seq : CTAGTTTGAGCGACTTG TCCA | PFseq1/PR2  | PR1        | CAGTGT(G)TTATGAG |
|                                                                         |                                           | PR2 : CACCCGCTGAAAAGATCAAG      |             |            |                  |
|                                                                         |                                           | PR1 : CACTGATCGGTTGTGGGAC       |             |            |                  |
| <i>spaw</i> <sup>s547</sup> ; <i>actb2</i> :Mmu. <i>Arl13b</i> -GFP     | Beis et al., 2005; Kalogirou et al., 2014 | PF1 : GCTCTGATGTGCCTGACG        | PF1/PR1     | PF1        | CATTGCAAT(A)GCA  |
|                                                                         |                                           | PR1 : TCGATCCACAGCAATCAAC       |             |            |                  |

499 **Table 1:** Statistical test of mirror-symmetry in the KV. The p-values result from a permutation test under the null hypothesis of a  
 500 mirror-symmetric KV  $\varphi_{\text{avg\_left}} = -\varphi_{\text{avg\_right}}$ .  
 501

502 **Table 2:** Relative frequencies of LR scoring outcomes and their standard errors (Supplemental Figure 4).  
 503

504 **Table 3:** Supplemental information concerning the genotyping strategies of the mutant lines used, including the designed primers  
 505 and mutation details. All primers were designed with the program ApE (<http://biologylabs.utah.edu/jorgensen/wayned/ape/>) and  
 506 using the genomic sequences available on Ensemble (*Ensembl genome browser 84*) for *dnaaf1*, *spaw* and *cup* genes. Embryos  
 507 from the *trilobite*<sup>tc240a</sup> (Heisenberg and Nusslein-Volhard, 1997) mutant line were identifiable by phenotype at all the stages  
 508 analyzed. *dnaaf1*<sup>tm317b</sup> (Sullivan-Brown et al., 2008) and *cup*<sup>tc241</sup> (Schottenfeld et al., 2007) mutant embryos were identifiable for  
 509 heart and gut scoring analysis (48-53 hpf) and were genotyped only at earlier stages. *spaw*<sup>s457</sup> (Kalogirou et al., 2014) mutant  
 510 embryos were always genotyped by sequencing.  
 511



512

513 **Movie 1: Cilia motility is impaired in the *dnaaf1*<sup>-/-</sup> embryos.** The movie shows the 3D live imaging of two KVs from the  
514 *Tg(dnaaf1<sup>tm317b</sup>; actb2:Mmu.Arl13b-GFP)* (Sullivan-Brown et al., 2008). Each embryo was soaked for 60 minutes in Bodipy TR  
515 (Molecular Probe) and imaged using 2PEF microscopy at 930 nm wavelengths, as described in (Ferreira et al., 2017). A full z-stack  
516 of both KVs can be seen. On the left, a KV from a sibling *dnaaf1*<sup>+/+</sup> with motile cilia (fan cones) is shown. On the right, a KV from a  
517 *dnaaf1*<sup>-/-</sup> embryo, with 100% of immotile cilia (bright straight lines) is shown.

518

## 519 Acknowledgements

520 We thank C. Norden, M. Blum, M. Fürthauer and the Vermot lab for discussion and thoughtful comments  
521 on the manuscript, in particular R. Chow for her help with editing. We also thank the Heisenberg lab for  
522 sharing the *trilobite* line. This work was supported by FRM (DEQ20140329553), the ANR (ANR-15-CE13-  
523 0015-01, ANR-12-ISV2-0001-01), the EMBO Young Investigator Program, the European Community,  
524 ERC CoG N°682938 Evalve and by the grant ANR-10-LABX-0030-INRT, a French State fund managed  
525 by the Agence Nationale de la Recherche under the frame program Investissements d'Avenir labeled  
526 ANR-10-IDEX-0002-02. R.R.F. was supported by the IGBMC International PhD program (LABEX). A.V.  
527 acknowledges support from the Slovenian Research Agency (grant P1-0099).

528

529

## 530 References

- 531 Blum, M., Schweickert, A., Vick, P., Wright, C.V., and Danilchik, M.V. (2014). Symmetry breakage in the  
532 vertebrate embryo: when does it happen and how does it work? *Dev Biol* 393, 109-123.
- 533 Borovina, A., Superina, S., Voskas, D., and Ciruna, B. (2010). Vangl2 directs the posterior tilting and  
534 asymmetric localization of motile primary cilia. *Nat Cell Biol* 12, 407-412.
- 535 Chien, Y.H., Srinivasan, S., Keller, R., and Kintner, C. (2018). Mechanical Strain Determines Cilia Length,  
536 Motility, and Planar Position in the Left-Right Organizer. *Dev Cell* 45, 316-330 e314.
- 537 Coutelis, J.B., Gonzalez-Morales, N., Geminard, C., and Noselli, S. (2014). Diversity and convergence in  
538 the mechanisms establishing L/R asymmetry in metazoa. *EMBO Rep* 15, 926-937.
- 539 Dasgupta, A., and Amack, J.D. (2016). Cilia in vertebrate left-right patterning. *Philos Trans R Soc Lond B*  
540 *Biol Sci* 371.
- 541 Davison, A., McDowell, G.S., Holden, J.M., Johnson, H.F., Koutsovoulos, G.D., Liu, M.M., Hulpiau, P.,  
542 Van Roy, F., Wade, C.M., Banerjee, R., et al. (2016). Formin Is Associated with Left-Right Asymmetry in  
543 the Pond Snail and the Frog. *Curr Biol* 26, 654-660.
- 544 Essner, J.J., Amack, J.D., Nyholm, M.K., Harris, E.B., and Yost, H.J. (2005). Kupffer's vesicle is a ciliated  
545 organ of asymmetry in the zebrafish embryo that initiates left-right development of the brain, heart and  
546 gut. *Development* 132, 1247-1260.
- 547 Faubel, R., Westendorf, C., Bodenschatz, E., and Eichele, G. (2016). Cilia-based flow network in the  
548 brain ventricles. *Science* 353, 176-178.
- 549 Ferreira, R.R., and Vermot, J. (2016). The balancing roles of mechanical forces during left-right patterning  
550 and asymmetric morphogenesis. *Mech Dev*.
- 551 Ferreira, R.R., Vilfan, A., Julicher, F., Supatto, W., and Vermot, J. (2017). Physical limits of flow sensing  
552 in the left-right organizer. *Elife* 6.
- 553 Francescato, L., Rothschild, S.C., Myers, A.L., and Tombes, R.M. (2010). The activation of membrane  
554 targeted CaMK-II in the zebrafish Kupffer's vesicle is required for left-right asymmetry. *Development* 137,  
555 2753-2762.
- 556 Gomez-Lopez, S., Lerner, R.G., and Petritsch, C. (2014). Asymmetric cell division of stem and progenitor  
557 cells during homeostasis and cancer. *Cell Mol Life Sci* 71, 575-597.

558 Grimes, D.T., Boswell, C.W., Morante, N.F., Henkelman, R.M., Burdine, R.D., and Ciruna, B. (2016).  
559 Zebrafish models of idiopathic scoliosis link cerebrospinal fluid flow defects to spine curvature. *Science*  
560 *352*, 1341-1344.

561 Gros, J., Feistel, K., Viebahn, C., Blum, M., and Tabin, C.J. (2009). Cell movements at Hensen's node  
562 establish left/right asymmetric gene expression in the chick. *Science* *324*, 941-944.

563 Guirao, B., Meunier, A., Mortaud, S., Aguilar, A., Corsi, J.M., Strehl, L., Hirota, Y., Desoeuvre, A., Boutin,  
564 C., Han, Y.G., *et al.* (2010). Coupling between hydrodynamic forces and planar cell polarity orients  
565 mammalian motile cilia. *Nat Cell Biol* *12*, 341-350.

566 Hamada, H., and Tam, P.P. (2014). Mechanisms of left-right asymmetry and patterning: driver, mediator  
567 and responder. *F1000Prime Rep* *6*, 110.

568 Hashimoto, M., and Hamada, H. (2010). Translation of anterior-posterior polarity into left-right polarity in  
569 the mouse embryo. *Curr Opin Genet Dev* *20*, 433-437.

570 Heisenberg, C.P., and Nusslein-Volhard, C. (1997). The function of *silberblick* in the positioning of the eye  
571 anlage in the zebrafish embryo. *Dev Biol* *184*, 85-94.

572 Hesterberg T, M.D., Monaghan S, Clipson A & Epstein R. (2005). Bootstrap methods and permutation  
573 tests. *Introduction to the Practice of Statistics* 5th edn *16*, 1–70.

574 Hilfinger, A., and Julicher, F. (2008). The chirality of ciliary beats. *Phys Biol* *5*, 016003.

575 Hong, H., Kim, J., and Kim, J. (2015). Myosin heavy chain 10 (MYH10) is required for centriole migration  
576 during the biogenesis of primary cilia. *Biochem Biophys Res Commun* *461*, 180-185.

577 Hozumi, S., Maeda, R., Taniguchi, K., Kanai, M., Shirakabe, S., Sasamura, T., Speder, P., Noselli, S.,  
578 Aigaki, T., Murakami, R., *et al.* (2006). An unconventional myosin in *Drosophila* reverses the default  
579 handedness in visceral organs. *Nature* *440*, 798-802.

580 Jaffe, K.M., Grimes, D.T., Schottenfeld-Roames, J., Werner, M.E., Ku, T.S., Kim, S.K., Pelliccia, J.L.,  
581 Morante, N.F., Mitchell, B.J., and Burdine, R.D. (2016). *c21orf59/kurly* Controls Both Cilia Motility and  
582 Polarization. *Cell Rep* *14*, 1841-1849.

583 Jessen, J.R., and Solnica-Krezel, L. (2004). Identification and developmental expression pattern of *van*  
584 *gogh-like 1*, a second zebrafish strabismus homologue. *Gene Expr Patterns* *4*, 339-344.

585 Juan, T., Geminard, C., Coutelis, J.B., Cerezo, D., Poles, S., Noselli, S., and Furthauer, M. (2018).  
586 Myosin1D is an evolutionarily conserved regulator of animal left-right asymmetry. *Nat Commun* *9*, 1942.

587 Kalogirou, S., Malissovass, N., Moro, E., Argenton, F., Stainier, D.Y., and Beis, D. (2014). Intracardiac flow  
588 dynamics regulate atrioventricular valve morphogenesis. *Cardiovasc Res* *104*, 49-60.

589 Kramer-Zucker, A.G., Olale, F., Haycraft, C.J., Yoder, B.K., Schier, A.F., and Drummond, I.A. (2005).  
590 Cilia-driven fluid flow in the zebrafish pronephros, brain and Kupffer's vesicle is required for normal  
591 organogenesis. *Development* *132*, 1907-1921.

592 Kuroda, R., Endo, B., Abe, M., and Shimizu, M. (2009). Chiral blastomere arrangement dictates zygotic  
593 left-right asymmetry pathway in snails. *Nature* *462*, 790-794.

594 Levin, M. (2005). Left-right asymmetry in embryonic development: a comprehensive review. *Mech Dev*  
595 *122*, 3-25.

596 Loges, N.T., Olbrich, H., Becker-Heck, A., Haffner, K., Heer, A., Reinhard, C., Schmidts, M., Kispert, A.,  
597 Zariwala, M.A., Leigh, M.W., *et al.* (2009). Deletions and point mutations of *LRRC50* cause primary ciliary  
598 dyskinesia due to dynein arm defects. *Am J Hum Genet* *85*, 883-889.

599 Long, S. (2003). The zebrafish nodal-related gene *southpaw* is required for visceral and diencephalic left-  
600 right asymmetry. *Development* *130*, 2303-2316.

601 Mahuzier, A., Shihavuddin, A., Fournier, C., Lansade, P., Faucourt, M., Menezes, N., Meunier, A., Garfa-  
602 Traore, M., Carlier, M.F., Voituriez, R., *et al.* (2018). Ependymal cilia beating induces an actin network to  
603 protect centrioles against shear stress. *Nat Commun* *9*, 2279.

604 Marshall, W.F., and Kintner, C. (2008). Cilia orientation and the fluid mechanics of development. *Curr*  
605 *Opin Cell Biol* *20*, 48-52.

606 Mitchell, D.R. (2003). Orientation of the central pair complex during flagellar bend formation in  
607 *Chlamydomonas*. *Cell Motil Cytoskeleton* *56*, 120-129.

608 Mitchison, H.M., and Valente, E.M. (2017). Motile and non-motile cilia in human pathology: from function  
609 to phenotypes. *J Pathol* *241*, 294-309.

610 Monteiro, R., van Dinther, M., Bakkers, J., Wilkinson, R., Patient, R., ten Dijke, P., and Mummery, C.  
611 (2008). Two novel type II receptors mediate BMP signalling and are required to establish left-right  
asymmetry in zebrafish. *Dev Biol* *315*, 55-71.

613 Morrow, S.M., Bissette, A.J., and Fletcher, S.P. (2017). Transmission of chirality through space and  
614 across length scales. *Nat Nanotechnol* 12, 410-419.

615 Naganathan, S.R., Furthauer, S., Nishikawa, M., Julicher, F., and Grill, S.W. (2014). Active torque  
616 generation by the actomyosin cell cortex drives left-right symmetry breaking. *Elife* 3, e04165.

617 Noel, E.S., Verhoeven, M., Lagendijk, A.K., Tessadori, F., Smith, K., Choorapoikayil, S., den Hertog, J.,  
618 and Bakkers, J. (2013). A Nodal-independent and tissue-intrinsic mechanism controls heart-looping  
619 chirality. *Nat Commun* 4, 2754.

620 Okada, Y., Takeda, S., Tanaka, Y., Izpisua Belmonte, J.C., and Hirokawa, N. (2005). Mechanism of nodal  
621 flow: a conserved symmetry breaking event in left-right axis determination. *Cell* 121, 633-644.

622 Pitaval, A., Tseng, Q., Bornens, M., and Thery, M. (2010). Cell shape and contractility regulate  
623 ciliogenesis in cell cycle-arrested cells. *J Cell Biol* 191, 303-312.

624 Qiu, D., Cheng, S.M., Wozniak, L., McSweeney, M., Perrone, E., and Levin, M. (2005). Localization and  
625 loss-of-function implicates ciliary proteins in early, cytoplasmic roles in left-right asymmetry. *Dev Dyn* 234,  
626 176-189.

627 Sarmah, B., Latimer, A.J., Appel, B., and Wente, S.R. (2005). Inositol polyphosphates regulate zebrafish  
628 left-right asymmetry. *Dev Cell* 9, 133-145.

629 Sato, K., Hiraiwa, T., Maekawa, E., Isomura, A., Shibata, T., and Kuranaga, E. (2015). Left-right  
630 asymmetric cell intercalation drives directional collective cell movement in epithelial morphogenesis. *Nat*  
631 *Commun* 6, 10074.

632 Schottenfeld, J., Sullivan-Brown, J., and Burdine, R.D. (2007). Zebrafish curly up encodes a Pkd2  
633 ortholog that restricts left-side-specific expression of southpaw. *Development* 134, 1605-1615.

634 Shibazaki, Y., Shimizu, M., and Kuroda, R. (2004). Body handedness is directed by genetically  
635 determined cytoskeletal dynamics in the early embryo. *Curr Biol* 14, 1462-1467.

636 Shinohara, K., and Hamada, H. (2017). Cilia in Left-Right Symmetry Breaking. *Cold Spring Harb Perspect*  
637 *Biol* 9.

638 Song, H., Hu, J., Chen, W., Elliott, G., Andre, P., Gao, B., and Yang, Y. (2010). Planar cell polarity breaks  
639 bilateral symmetry by controlling ciliary positioning. *Nature* 466, 378-382.

640 Speder, P., Adam, G., and Noselli, S. (2006). Type ID unconventional myosin controls left-right  
641 asymmetry in *Drosophila*. *Nature* 440, 803-807.

642 Sullivan-Brown, J., Schottenfeld, J., Okabe, N., Hostetter, C.L., Serluca, F.C., Thiberge, S.Y., and  
643 Burdine, R.D. (2008). Zebrafish mutations affecting cilia motility share similar cystic phenotypes and  
644 suggest a mechanism of cyst formation that differs from *pkd2* morphants. *Dev Biol* 314, 261-275.

645 Taber, L.A. (2006). Biophysical mechanisms of cardiac looping. *Int J Dev Biol* 50, 323-332.

646 Tabin, C.J., and Vogon, K.J. (2003). A two-cilia model for vertebrate left-right axis specification. *Genes*  
647 *Dev* 17, 1-6.

648 Tamm, S.L., Sonneborn, T.M., and Dippell, R.V. (1975). The role of cortical orientation in the control of  
649 the direction of ciliary beat in *Paramecium*. *J Cell Biol* 64, 98-112.

650 Tee, Y.H., Shemesh, T., Thiagarajan, V., Hariadi, R.F., Anderson, K.L., Page, C., Volkmann, N., Hanein,  
651 D., Sivaramakrishnan, S., Kozlov, M.M., *et al.* (2015). Cellular chirality arising from the self-organization of  
652 the actin cytoskeleton. *Nat Cell Biol* 17, 445-457.

653 Thisse, C., and Thisse, B. (2008). High-resolution in situ hybridization to whole-mount zebrafish embryos.  
654 *Nat Protoc* 3, 59-69.

655 Tingler, M., Kurz, S., Maerker, M., Ott, T., Fuhl, F., Schweickert, A., LeBlanc-Straceski, J.M., Noselli, S.,  
656 and Blum, M. (2018). A Conserved Role of the Unconventional Myosin 1d in Laterality Determination.  
657 *Curr Biol* 28, 810-816 e813.

658 Wagnière, G.H. (2007). *On Chirality and the Universal Asymmetry: Reflections on Image and Mirror*  
659 *Image*. Weinheim, Germany: Wiley-VCH.

660 Wallingford, J.B. (2012). Planar cell polarity and the developmental control of cell behavior in vertebrate  
661 embryos. *Annu Rev Cell Dev Biol* 28, 627-653.

662 Wan, L.Q., Ronaldson, K., Park, M., Taylor, G., Zhang, Y., Gimble, J.M., and Vunjak-Novakovic, G.  
663 (2011). Micropatterned mammalian cells exhibit phenotype-specific left-right asymmetry. *Proc Natl Acad*  
664 *Sci U S A* 108, 12295-12300.

665 Wang, G., Cadwallader, A.B., Jang, D.S., Tsang, M., Yost, H.J., and Amack, J.D. (2011). The Rho kinase  
666 *Rock2b* establishes anteroposterior asymmetry of the ciliated Kupffer's vesicle in zebrafish. *Development*  
667 138, 45-54.

668 Wang, G., Manning, M.L., and Amack, J.D. (2012). Regional cell shape changes control form and  
669 function of Kupffer's vesicle in the zebrafish embryo. *Dev Biol* 370, 52-62.  
670 Xu, J., Van Keymeulen, A., Wakida, N.M., Carlton, P., Berns, M.W., and Bourne, H.R. (2007). Polarity  
671 reveals intrinsic cell chirality. *Proc Natl Acad Sci U S A* 104, 9296-9300.  
672 Yuan, S., Zhao, L., Brueckner, M., and Sun, Z. (2015). Intraciliary calcium oscillations initiate vertebrate  
673 left-right asymmetry. *Curr Biol* 25, 556-567.

674
